# Supplementary material
Source: ML conference proceedings conference paper supplement (https://openreview.net/forum?id=6vcgsrK6pN)
Supplement: supplementary_material [file legend.pdf › Tree-Extractor-Submit/experiments/plots/DualCF/legend.pdf]

———— DualCF\_MLP\_DiCE

- - DualCF\_MLP\_OCEAN

———— DualCF\_DT+\_DiCE

- - DualCF\_DT+\_OCEAN

———— DualCF\_DT\_DiCE

- - DualCF\_DT\_OCEAN
