# Supplementary material
Source: ML conference proceedings conference paper supplement (https://openreview.net/forum?id=6vcgsrK6pN)
Supplement: supplementary_material [file legend.pdf › Tree-Extractor-Submit/experiments/plots/Heuristic/MFvsQ/legend.pdf]

— TRA\_HEURISTIC — TRA\_OCEAN
