# Supplementary material
Source: ML conference proceedings conference paper supplement (https://openreview.net/forum?id=6vcgsrK6pN)
Supplement: supplementary_material [file uci_credit.doc]

1. Title: Credit Approval

2. Sources:
    (confidential)
    Submitted by quinlan@cs.su.oz.au

3.  Past Usage:

    See Quinlan,
    * "Simplifying decision trees", Int J Man-Machine Studies 27,
      Dec 1987, pp. 221-234.
    * "C4.5: Programs for Machine Learning", Morgan Kaufmann, Oct 1992

4.  Relevant Information:

    This file concerns credit card applications.  All attribute names
    and values have been changed to meaningless symbols to protect
    confidentiality of the data.

    This dataset is interesting because there is a good mix of
    attributes -- continuous, nominal with small numbers of
    values, and nominal with larger numbers of values.  There
    are also a few missing values.

5.  Number of Instances: 690

6.  Number of Attributes: 15 + class attribute

7.  Attribute Information:

    A1: b, a.
    A2: continuous.
    A3: continuous.
    A4: u, y, l, t.
    A5: g, p, gg.
    A6: c, d, cc, i, j, k, m, r, q, w, x, e, aa, ff.
    A7: v, h, bb, j, n, z, dd, ff, o.
    A8: continuous.
    A9: t, f.
    A10:  t, f.
    A11:  continuous.
    A12:  t, f.
    A13:  g, p, s.
    A14:  continuous.
    A15:  continuous.
    A16: +,-         (class attribute)

8.  Missing Attribute Values:
    37 cases (5%) have one or more missing values.  The missing
    values from particular attributes are:

    A1:  12
    A2:  12
    A4:   6
    A5:   6
    A6:   9
    A7:   9
    A14: 13

9.  Class Distribution

    +: 307 (44.5%)
    -: 383 (55.5%)
