# Supplementary material
Source: ML conference proceedings conference paper supplement (https://openreview.net/forum?id=6vcgsrK6pN)
Supplement: supplementary_material [file uci_german.doc]

1. Title: German Credit data

2. Source Information

Professor Dr. Hans Hofmann
Institut f"ur Statistik und "Okonometrie
Universit"at Hamburg
FB Wirtschaftswissenschaften
Von-Melle-Park 5
2000 Hamburg 13

3. Number of Instances:  1000

Two datasets are provided.  the original dataset, in the form provided
by Prof. Hofmann, contains categorical/symbolic attributes and
is in the file "german.data".

For algorithms that need numerical attributes, Strathclyde University
produced the file "german.data-numeric".  This file has been edited
and several indicator variables added to make it suitable for
algorithms which cannot cope with categorical variables.   Several
attributes that are ordered categorical (such as attribute 17) have
been coded as integer.    This was the form used by StatLog.


6. Number of Attributes german: 20 (7 numerical, 13 categorical (9 nominal, 3 ordinal, 1 unclear))
   Number of Attributes german.numer: 24 (24 numerical)


7.  Attribute description for german

Attribute 1:  (categorical / ordinal)
         Status of existing checking account
               A11 :      ... <    0 DM
         A12 : 0 <= ... <  200 DM
         A13 :      ... >= 200 DM /
         salary assignments for at least 1 year
               A14 : no checking account

Attribute 2:  (numerical)
        Duration in month

Attribute 3:  (categorical / nominal)
        Credit history
        A30 : no credits taken/
        all credits paid back duly
              A31 : all credits at this bank paid back duly
        A32 : existing credits paid back duly till now
              A33 : delay in paying off in the past
        A34 : critical account/
        other credits existing (not at this bank)

Attribute 4:  (categorical / nominal)
        Purpose
        A40 : car (new)
        A41 : car (used)
        A42 : furniture/equipment
        A43 : radio/television
        A44 : domestic appliances
        A45 : repairs
        A46 : education
        A47 : (vacation - does not exist?)
        A48 : retraining
        A49 : business
        A410 : others

Attribute 5:  (numerical)
        Credit amount

Attibute 6:  (categorical / ordinal)
        Savings account/bonds
        A61 :          ... <  100 DM
        A62 :   100 <= ... <  500 DM
        A63 :   500 <= ... < 1000 DM
        A64 :          .. >= 1000 DM
              A65 :   unknown/ no savings account

Attribute 7:  (categorical / ordinal)
        Present employment since
        A71 : unemployed
        A72 :       ... < 1 year
        A73 : 1  <= ... < 4 years
        A74 : 4  <= ... < 7 years
        A75 :       .. >= 7 years

Attribute 8:  (numerical)
        Installment rate in percentage of disposable income

Attribute 9:  (categorical / nominal)
        Personal status and sex
        A91 : male   : divorced/separated
        A92 : female : divorced/separated/married
              A93 : male   : single
        A94 : male   : married/widowed
        A95 : female : single

Attribute 10: (categorical / nominal)
        Other debtors / guarantors
        A101 : none
        A102 : co-applicant
        A103 : guarantor

Attribute 11: (numerical)
        Present residence since

Attribute 12: (categorical / nominal)
        Property
        A121 : real estate
        A122 : if not A121 : building society savings agreement/
           life insurance
              A123 : if not A121/A122 : car or other, not in attribute 6
        A124 : unknown / no property

Attribute 13: (numerical)
        Age in years

Attribute 14: (categorical / nominal)
        Other installment plans
        A141 : bank
        A142 : stores
        A143 : none

Attribute 15: (categorical / nominal)
        Housing
        A151 : rent
        A152 : own
        A153 : for free

Attribute 16: (numerical)
              Number of existing credits at this bank

Attribute 17: (categorical / ordinal ???? nominal)
        Job
        A171 : unemployed/ unskilled  - non-resident
        A172 : unskilled - resident
        A173 : skilled employee / official
        A174 : management/ self-employed/
         highly qualified employee/ officer

Attribute 18: (numerical)
        Number of people being liable to provide maintenance for

Attribute 19: (categorical / nominal)
        Telephone
        A191 : none
        A192 : yes, registered under the customers name

Attribute 20: (categorical / nominal)
        foreign worker
        A201 : yes
        A202 : no
