# Supplementary material
Source: ML conference proceedings conference paper supplement (https://openreview.net/forum?id=6vcgsrK6pN)

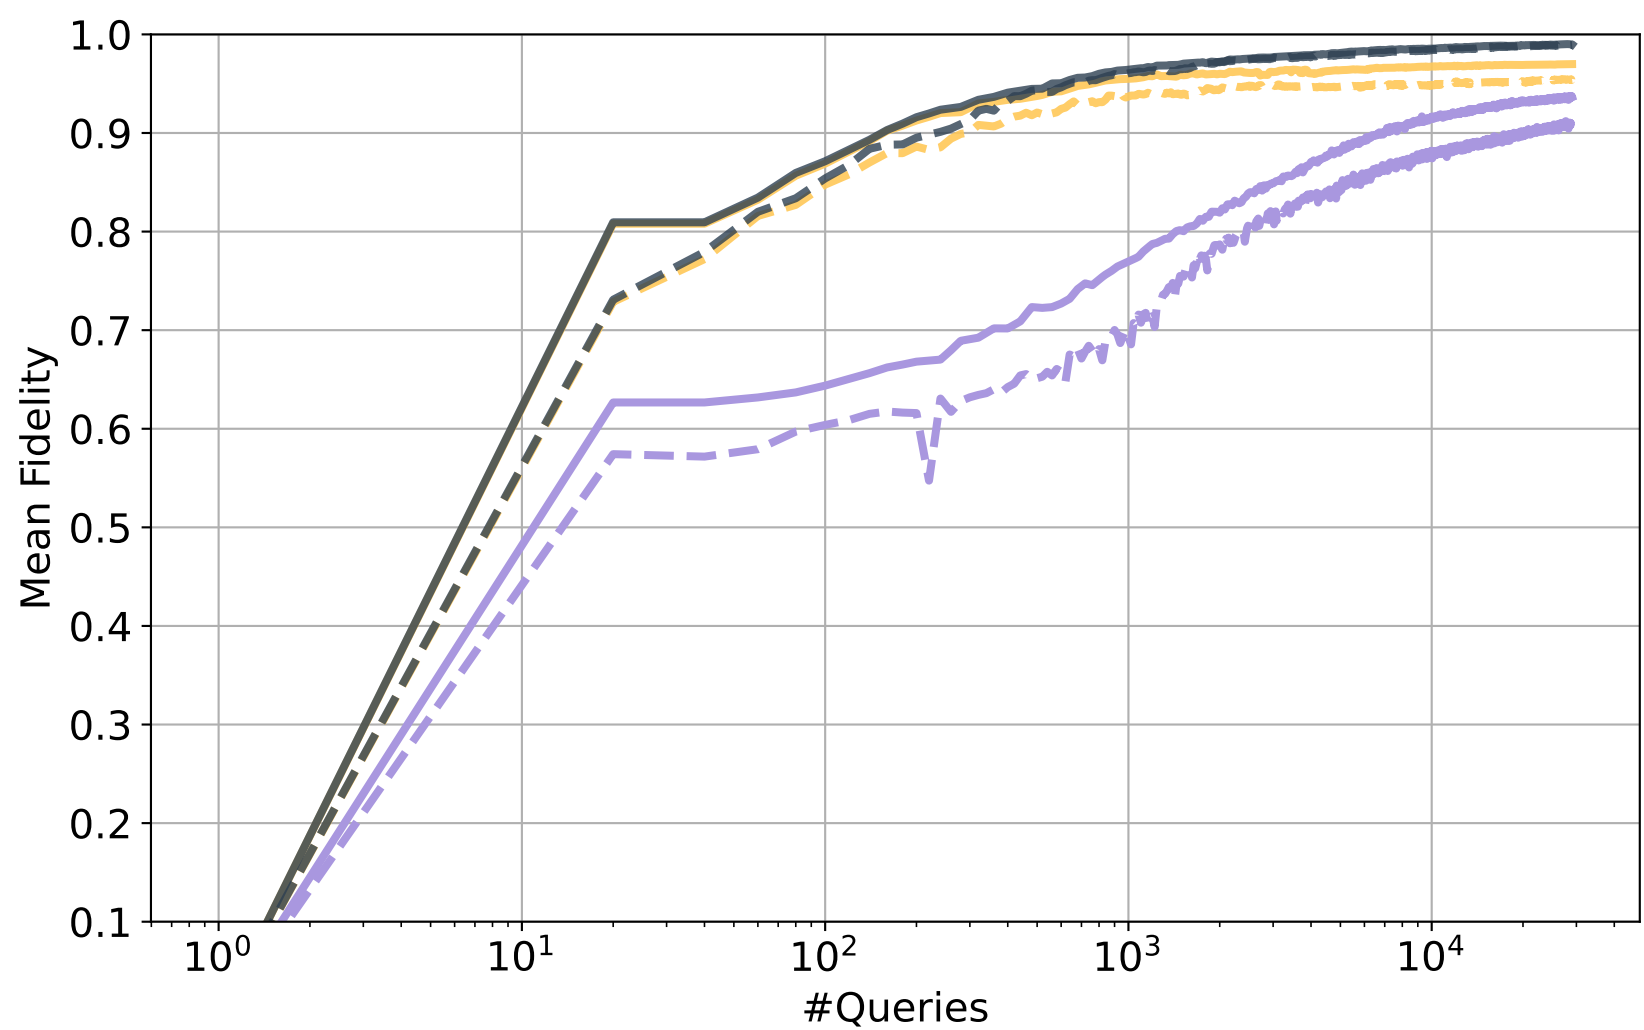

Supplement: supplementary_material [file CF_Adult.pdf › Tree-Extractor-Submit/experiments/plots/CF/CF_Adult.pdf]

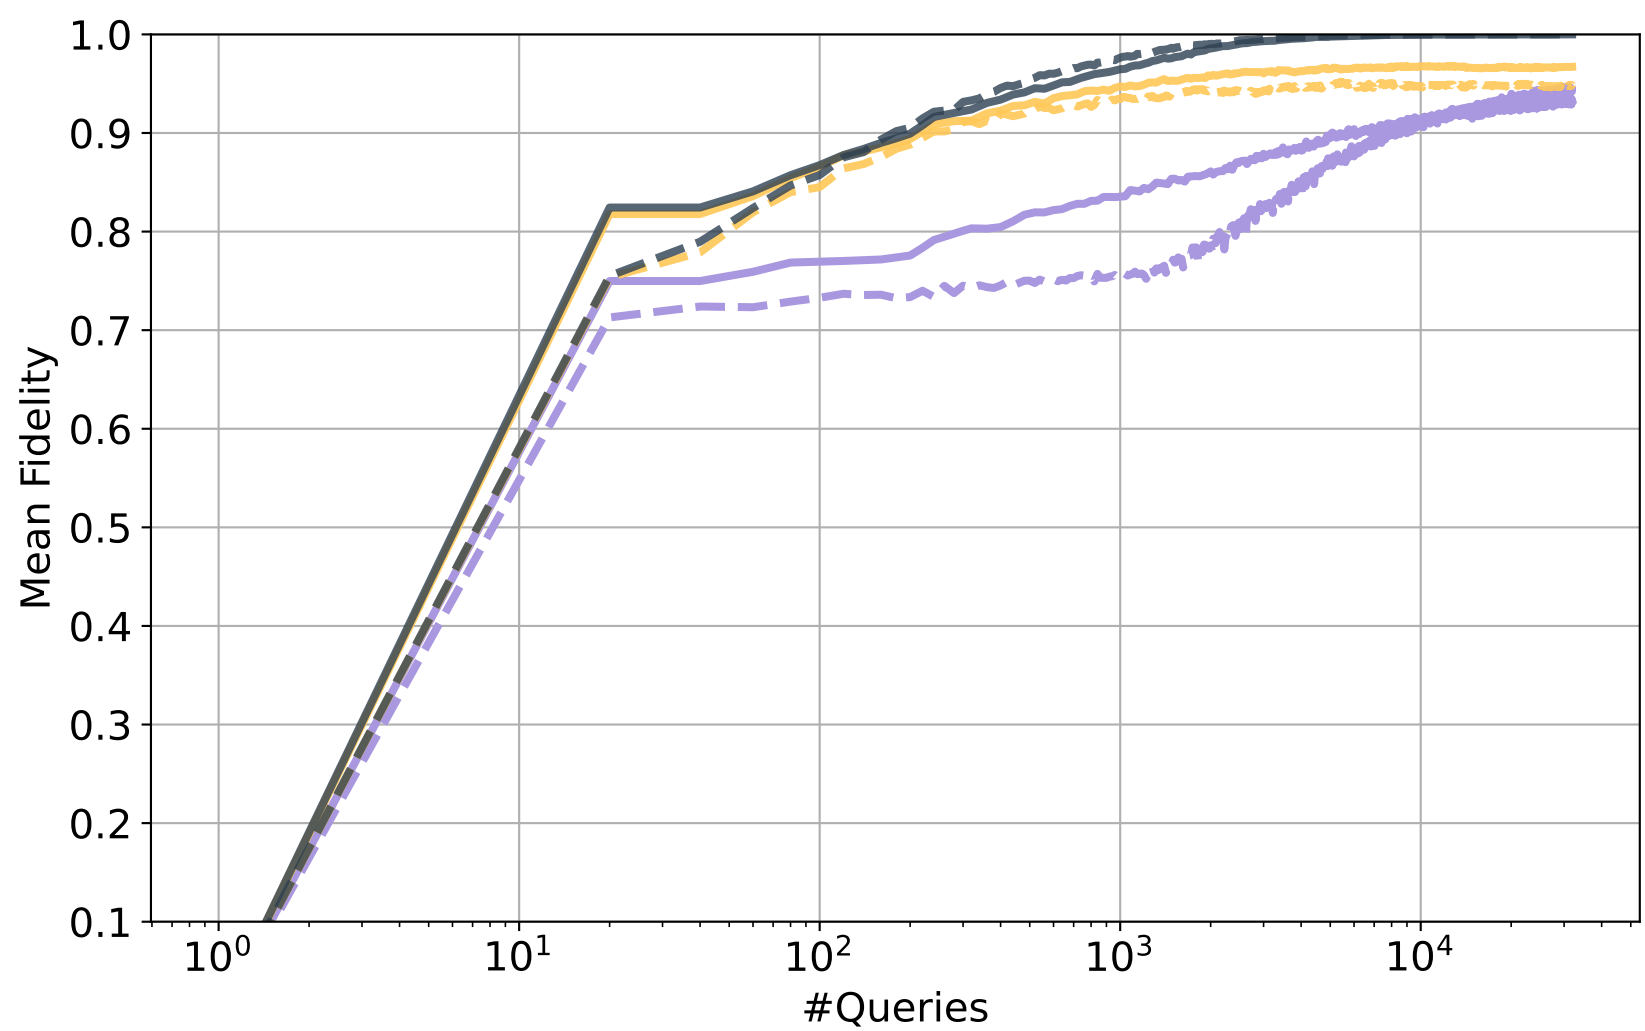

Supplement: supplementary_material [file CF_COMPAS.pdf › Tree-Extractor-Submit/experiments/plots/CF/CF_COMPAS.pdf]

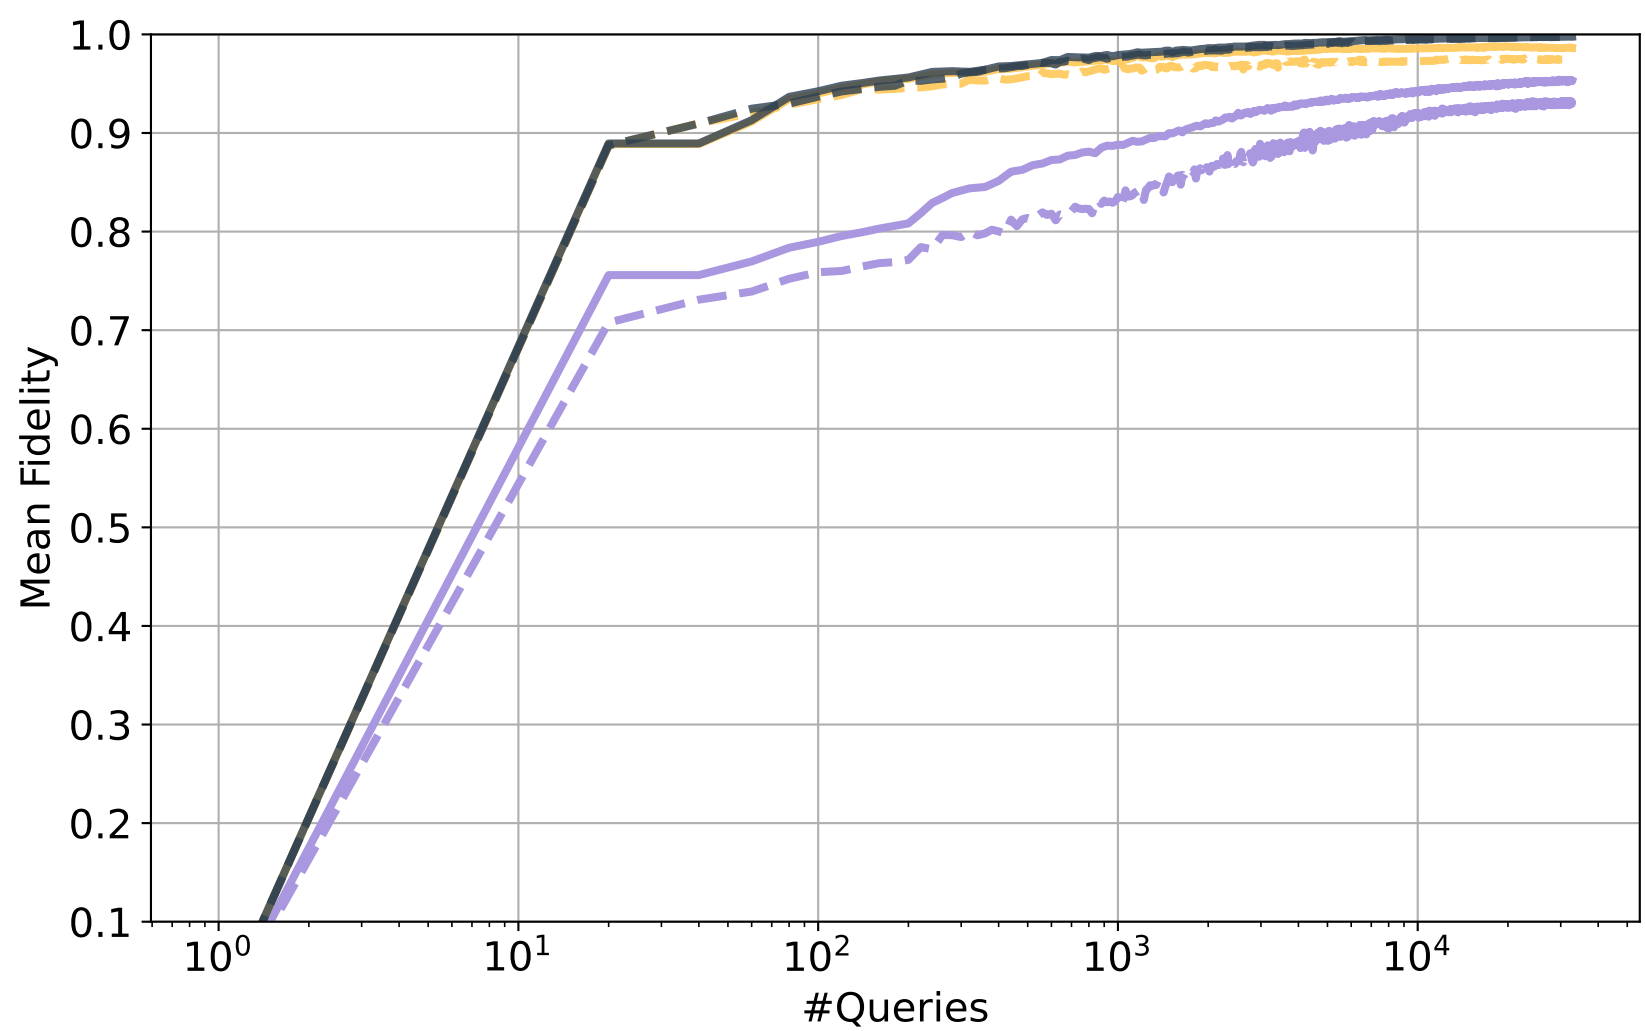

Supplement: supplementary_material [file CF_CreditCard.pdf › Tree-Extractor-Submit/experiments/plots/CF/CF_CreditCard.pdf]

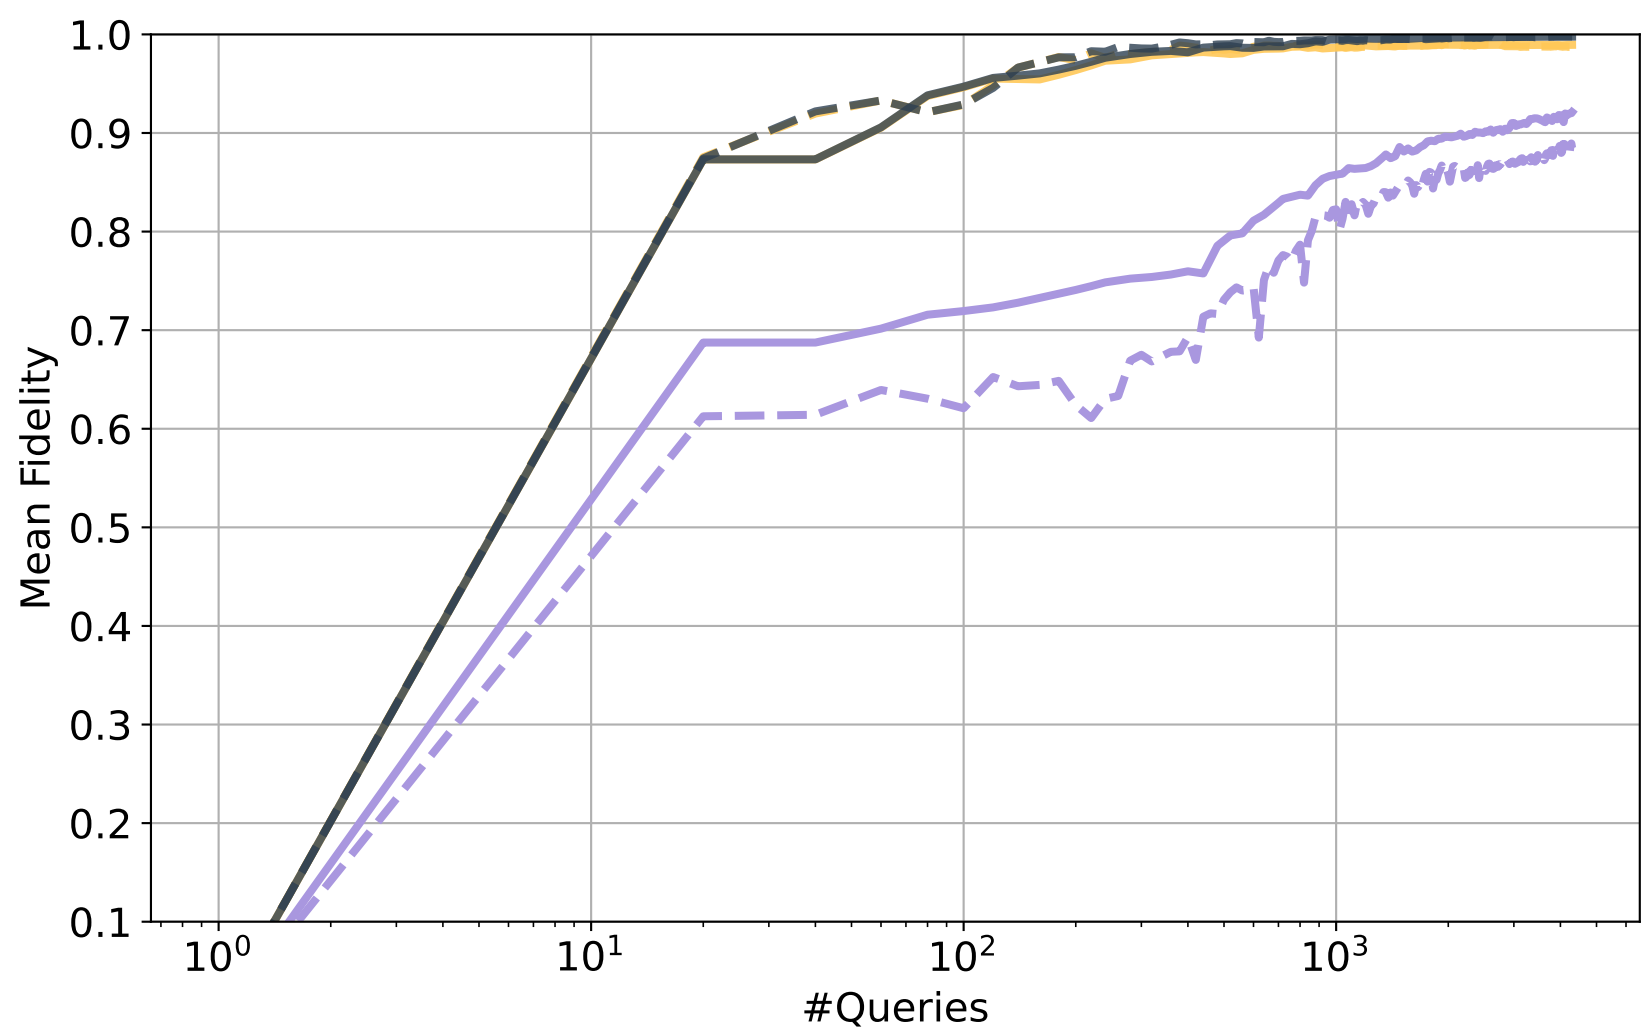

Supplement: supplementary_material [file CF_GCredit.pdf › Tree-Extractor-Submit/experiments/plots/CF/CF_GCredit.pdf]

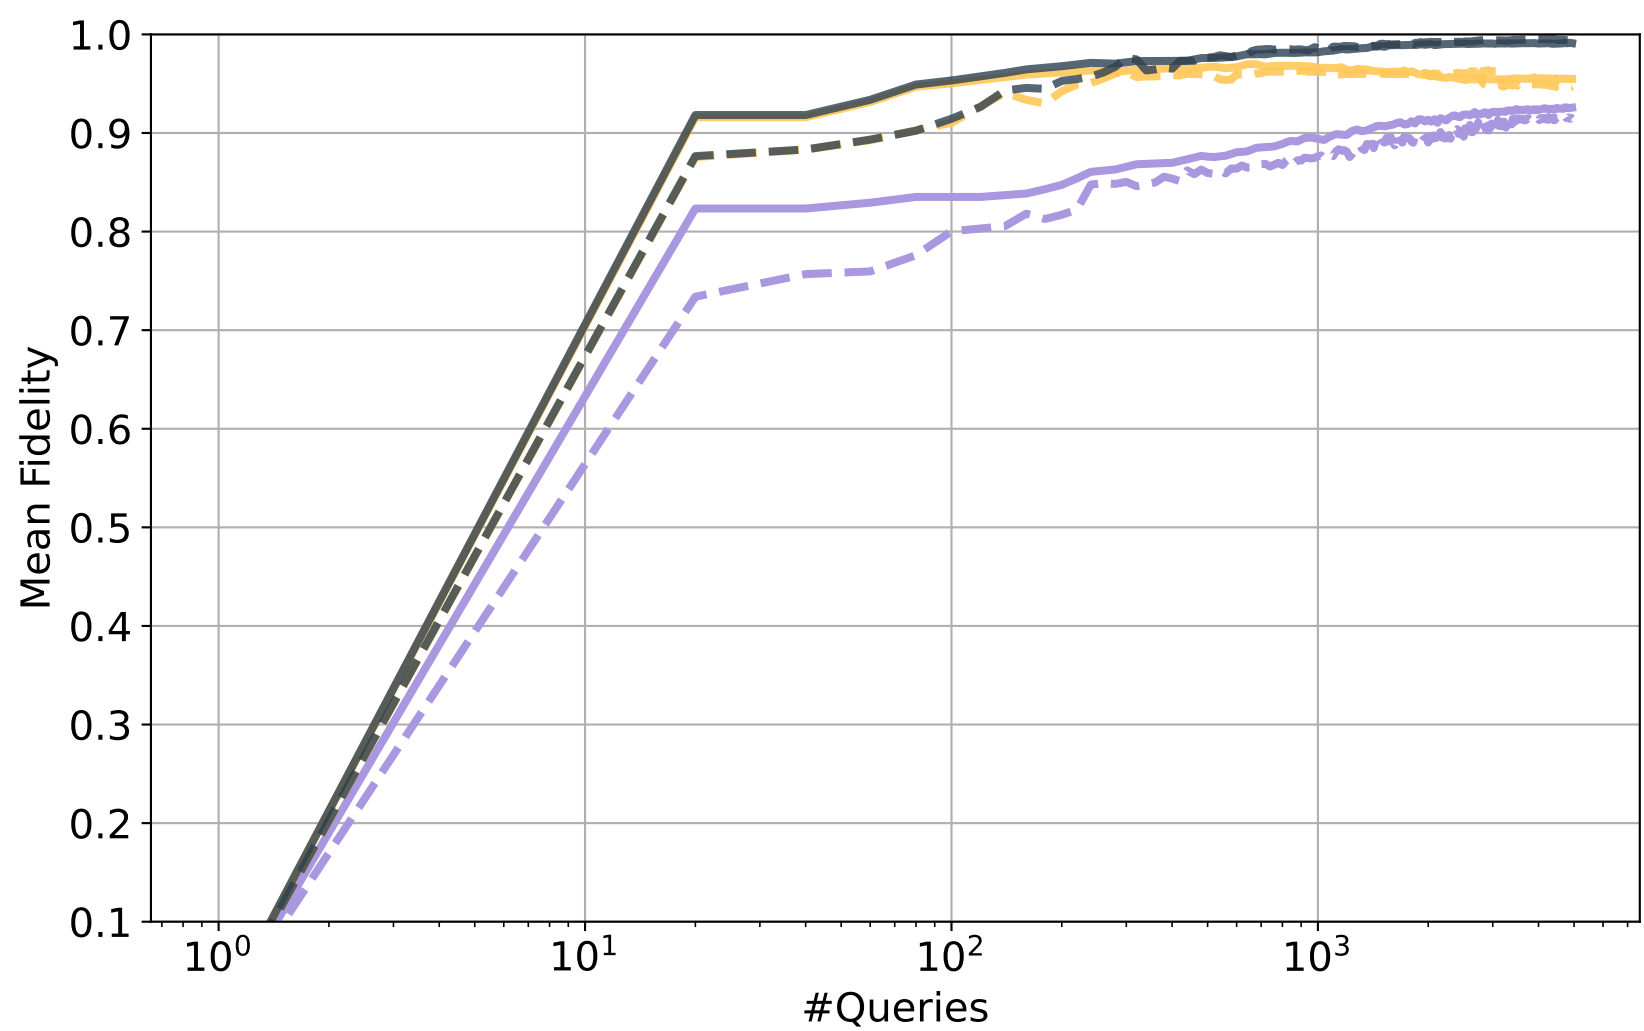

Supplement: supplementary_material [file CF_SPerformanceMAT.pdf › Tree-Extractor-Submit/experiments/plots/CF/CF_SPerformanceMAT.pdf]

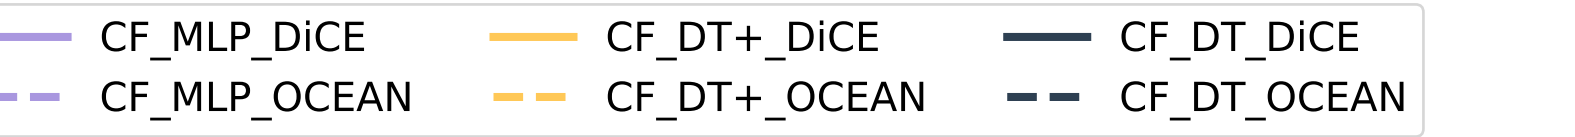

Supplement: supplementary_material [file legend.pdf › Tree-Extractor-Submit/experiments/plots/CF/legend.pdf]

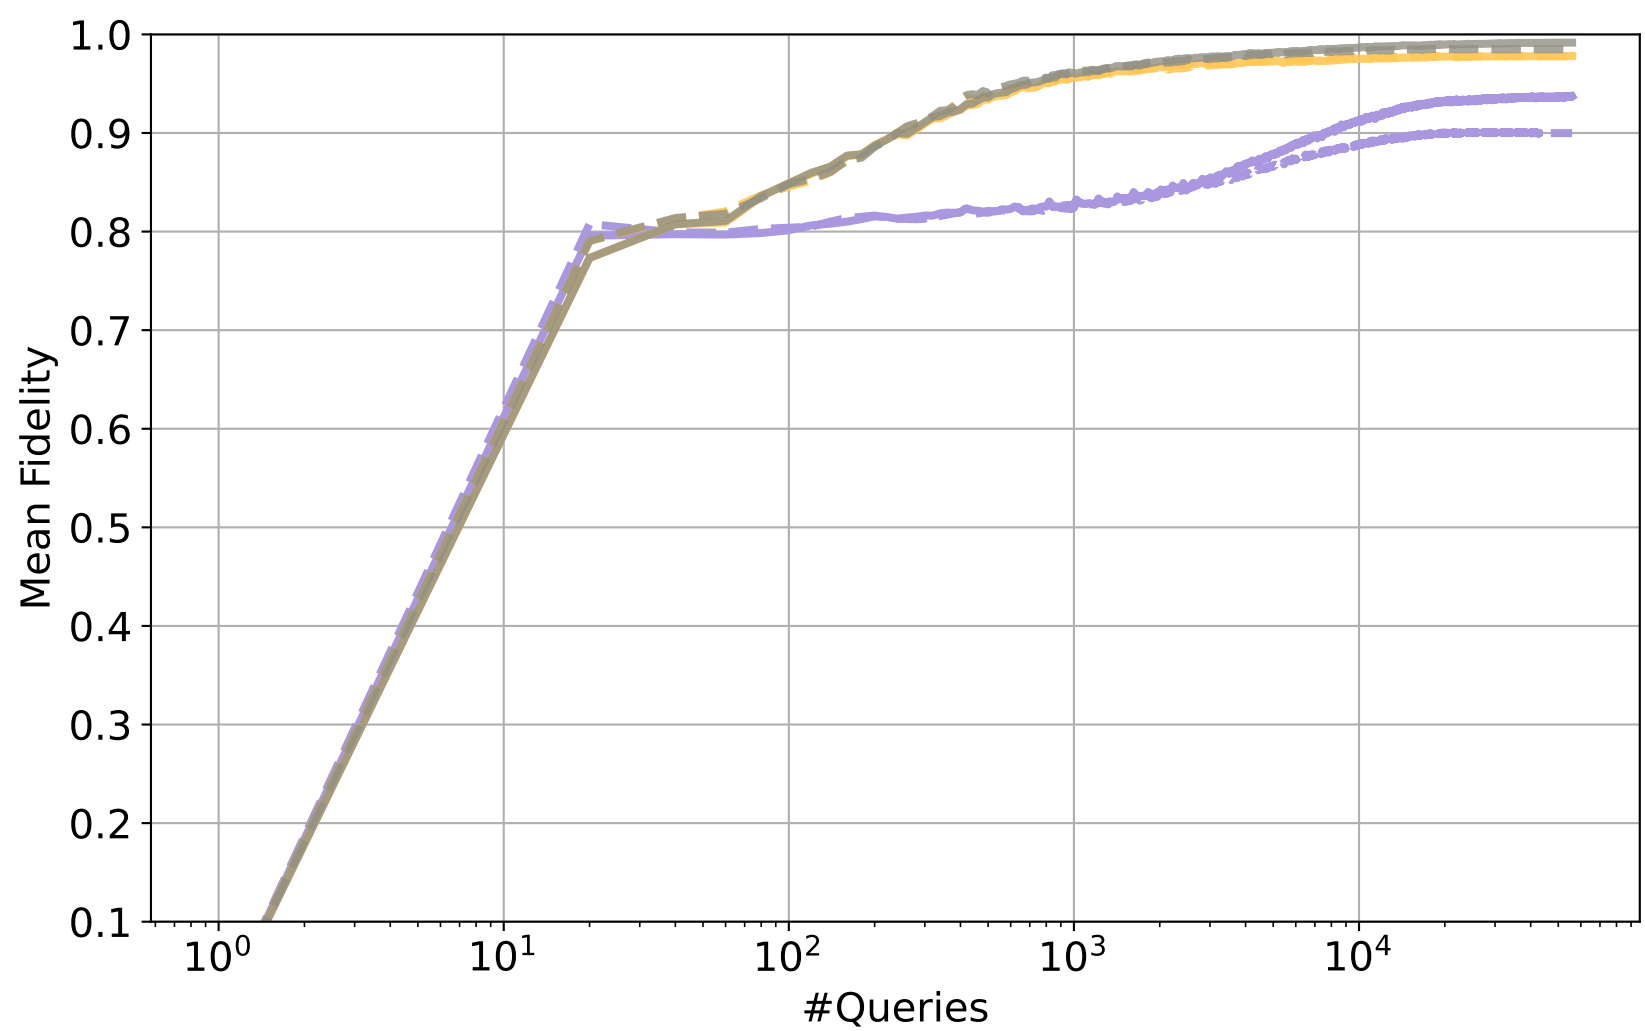

Supplement: supplementary_material [file DualCF_Adult.pdf › Tree-Extractor-Submit/experiments/plots/DualCF/DualCF_Adult.pdf]

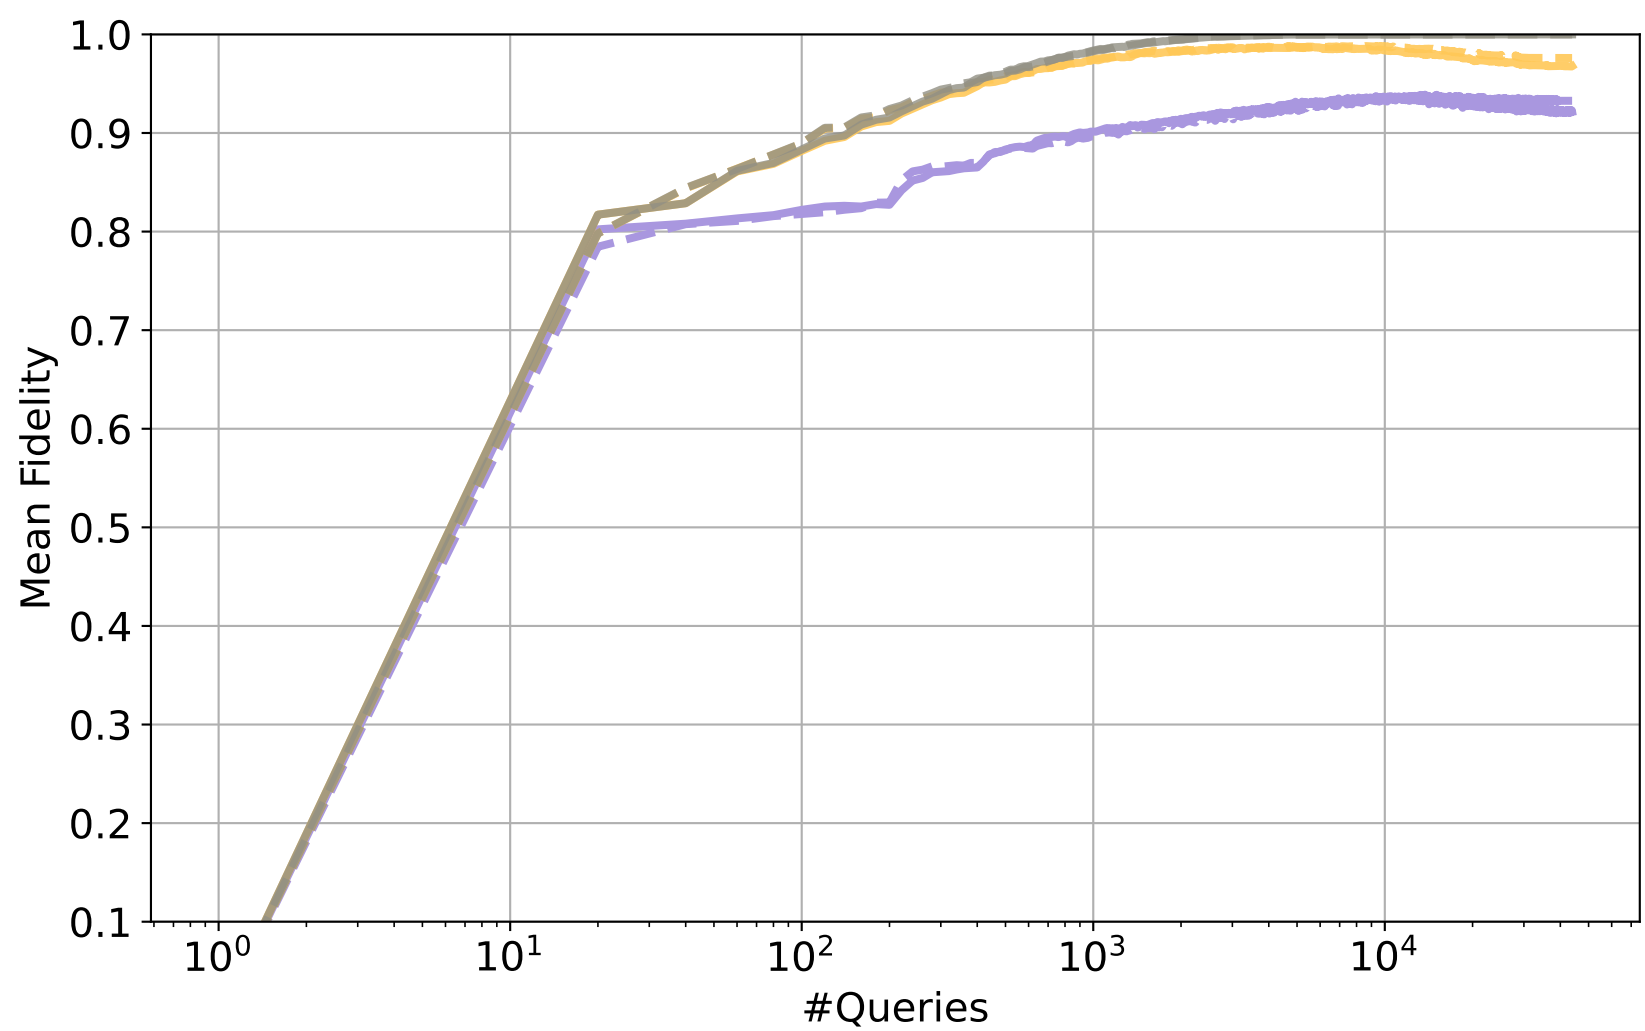

Supplement: supplementary_material [file DualCF_COMPAS.pdf › Tree-Extractor-Submit/experiments/plots/DualCF/DualCF_COMPAS.pdf]

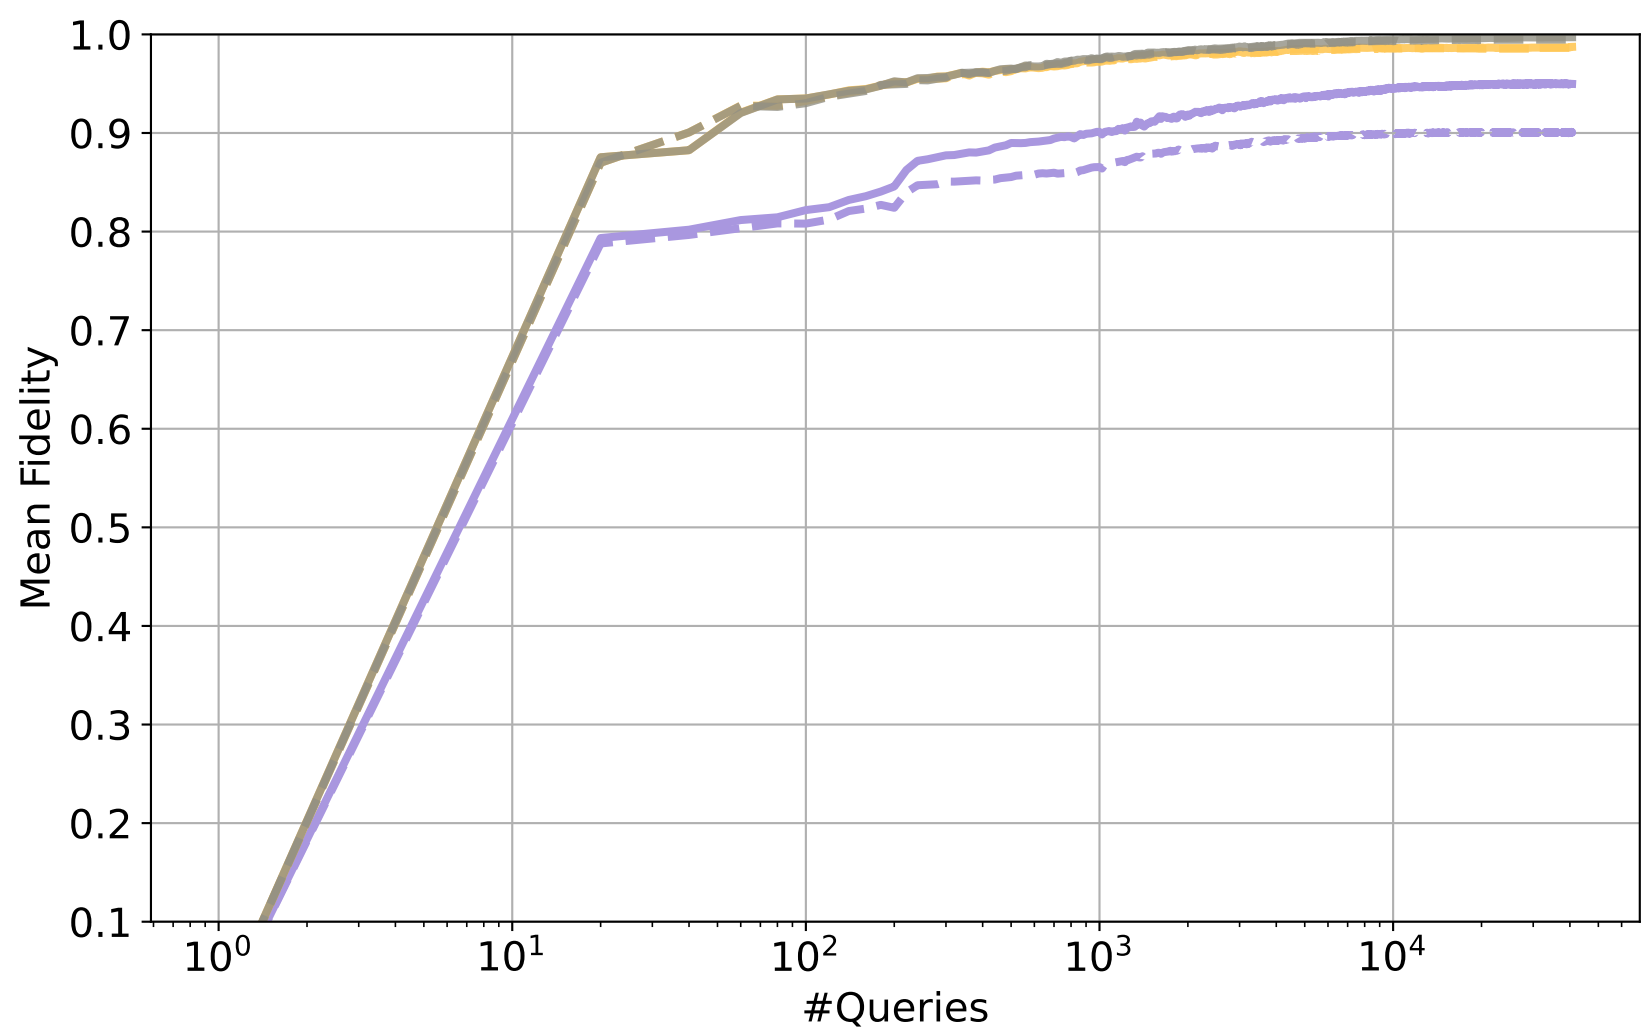

Supplement: supplementary_material [file DualCF_CreditCard.pdf › Tree-Extractor-Submit/experiments/plots/DualCF/DualCF_CreditCard.pdf]

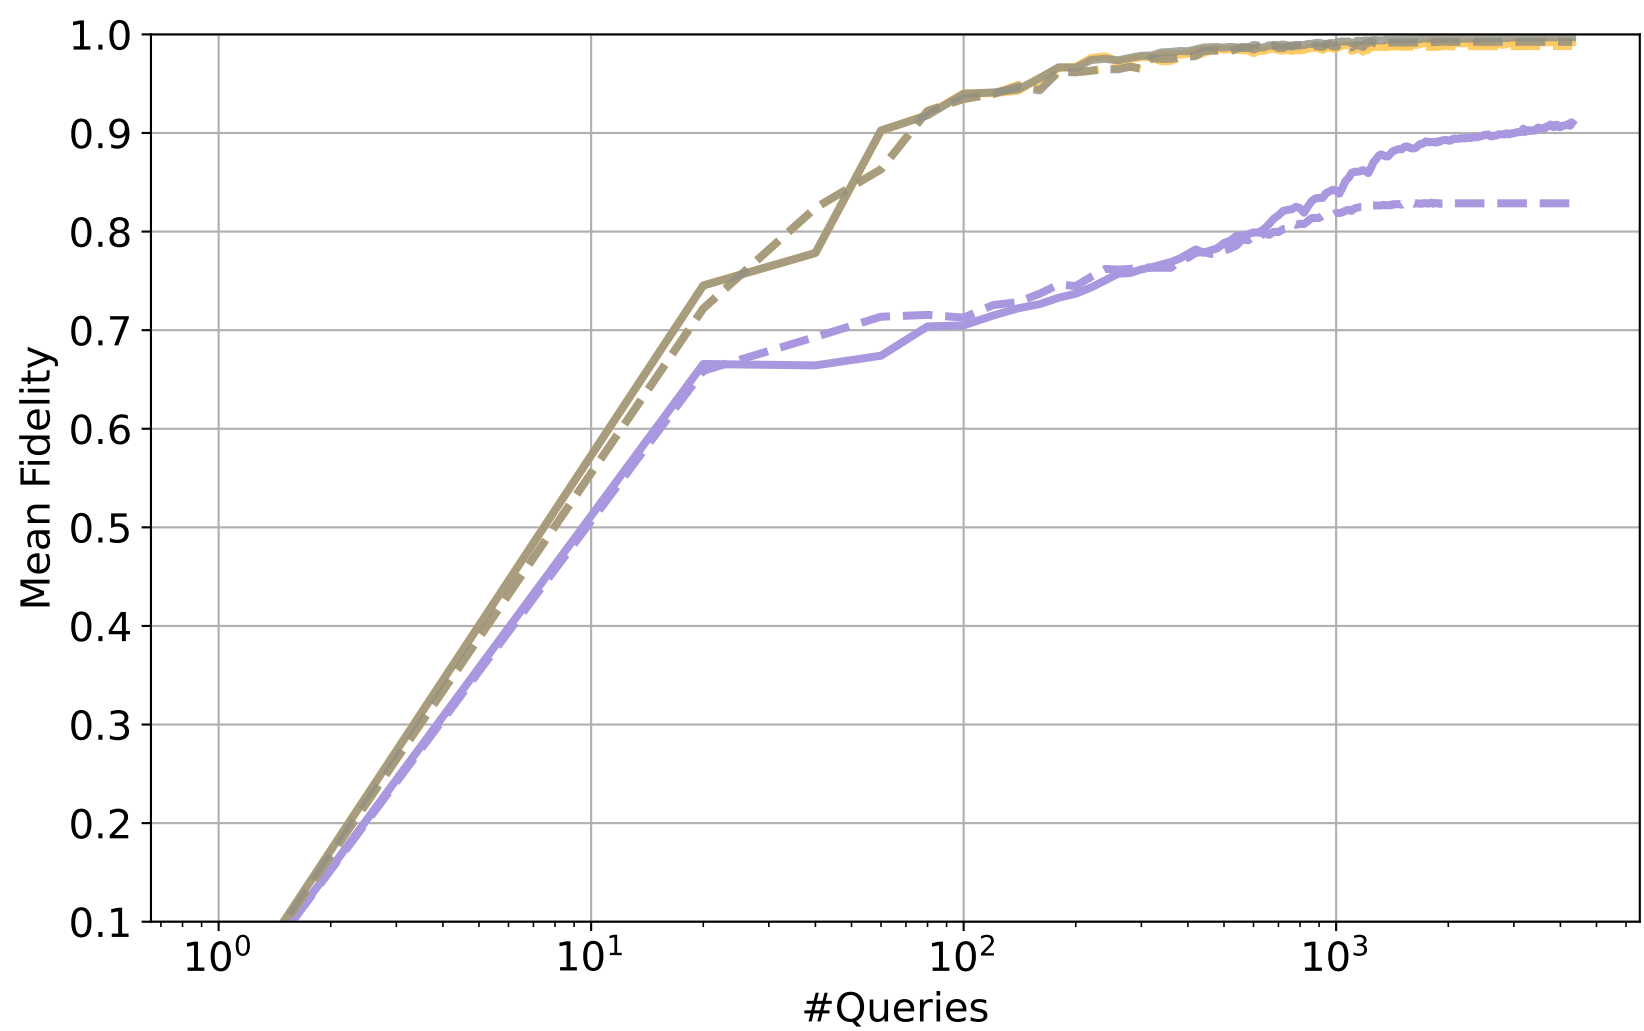

Supplement: supplementary_material [file DualCF_GCredit.pdf › Tree-Extractor-Submit/experiments/plots/DualCF/DualCF_GCredit.pdf]

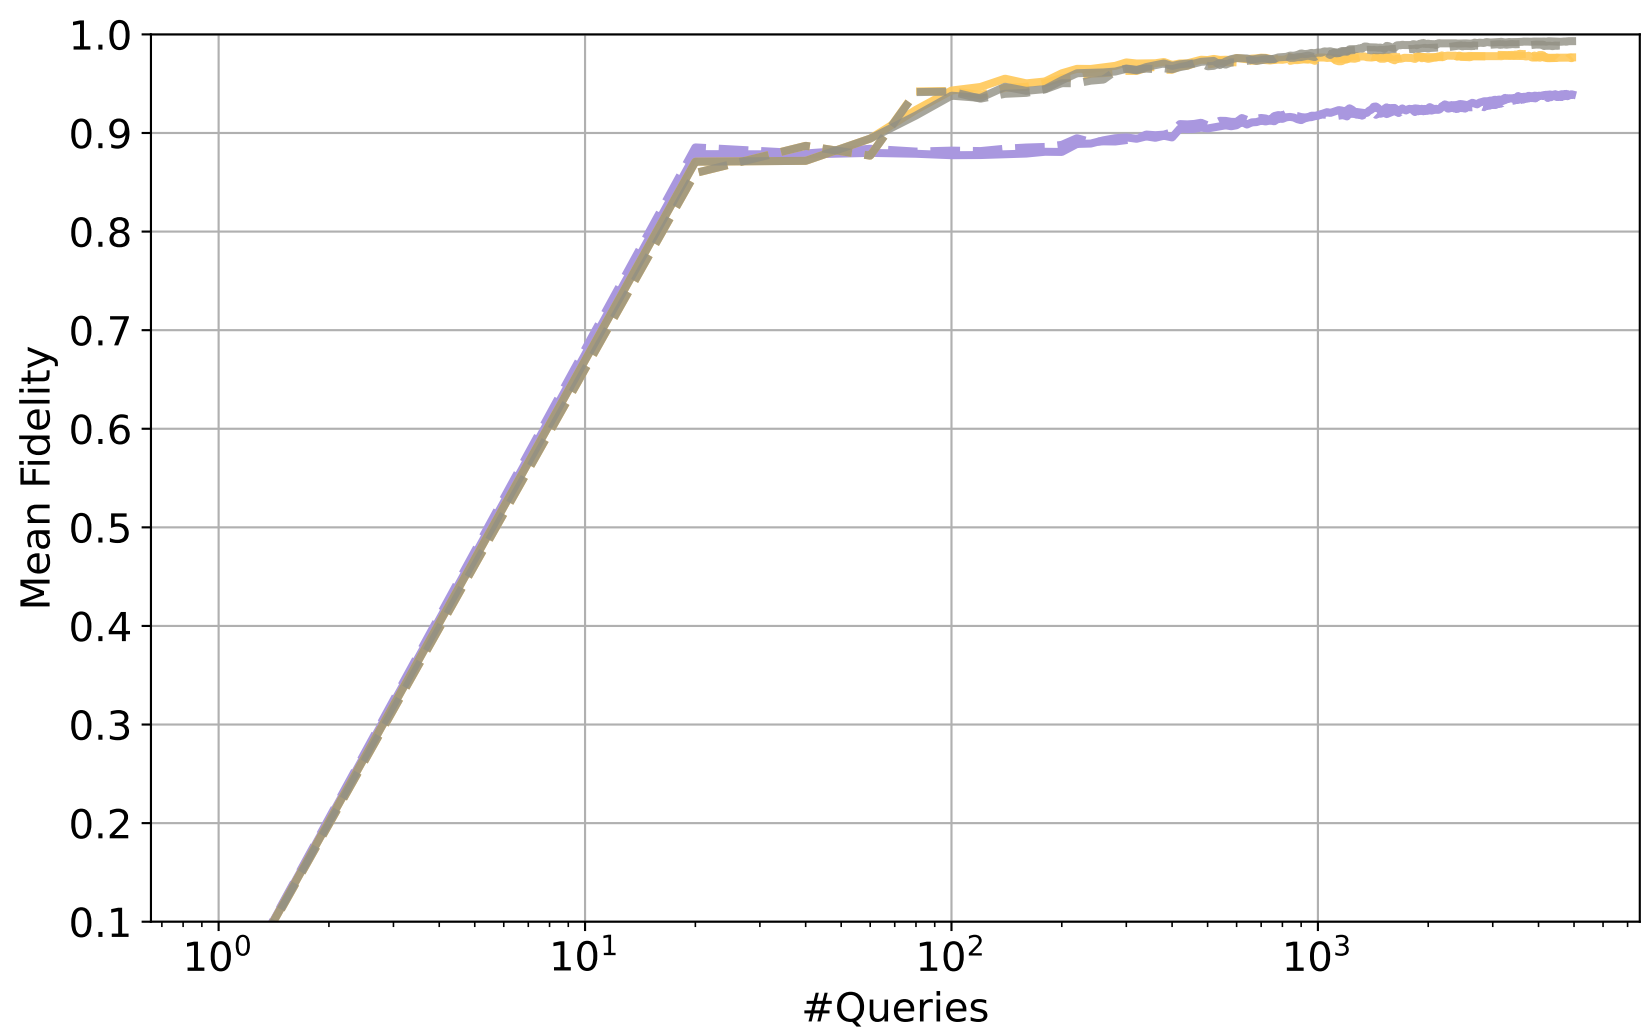

Supplement: supplementary_material [file DualCF_SPerformanceMAT.pdf › Tree-Extractor-Submit/experiments/plots/DualCF/DualCF_SPerformanceMAT.pdf]

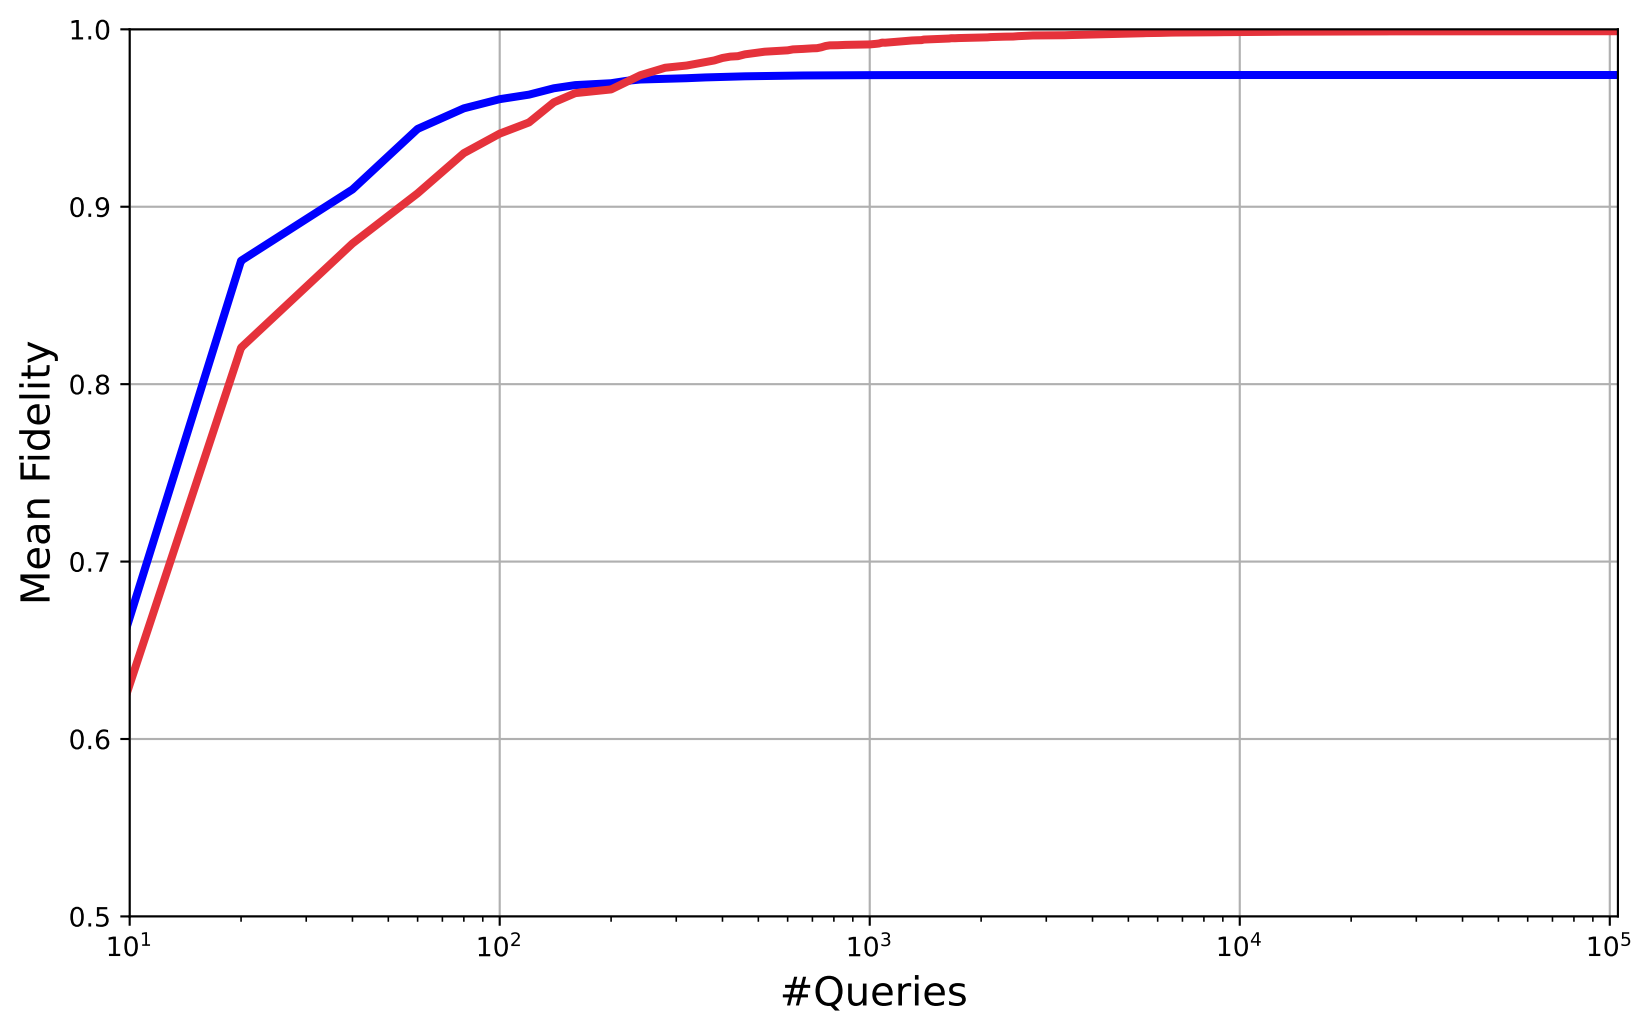

Supplement: supplementary_material [file MFvsQ_Adult.pdf › Tree-Extractor-Submit/experiments/plots/Heuristic/MFvsQ/MFvsQ_Adult.pdf]

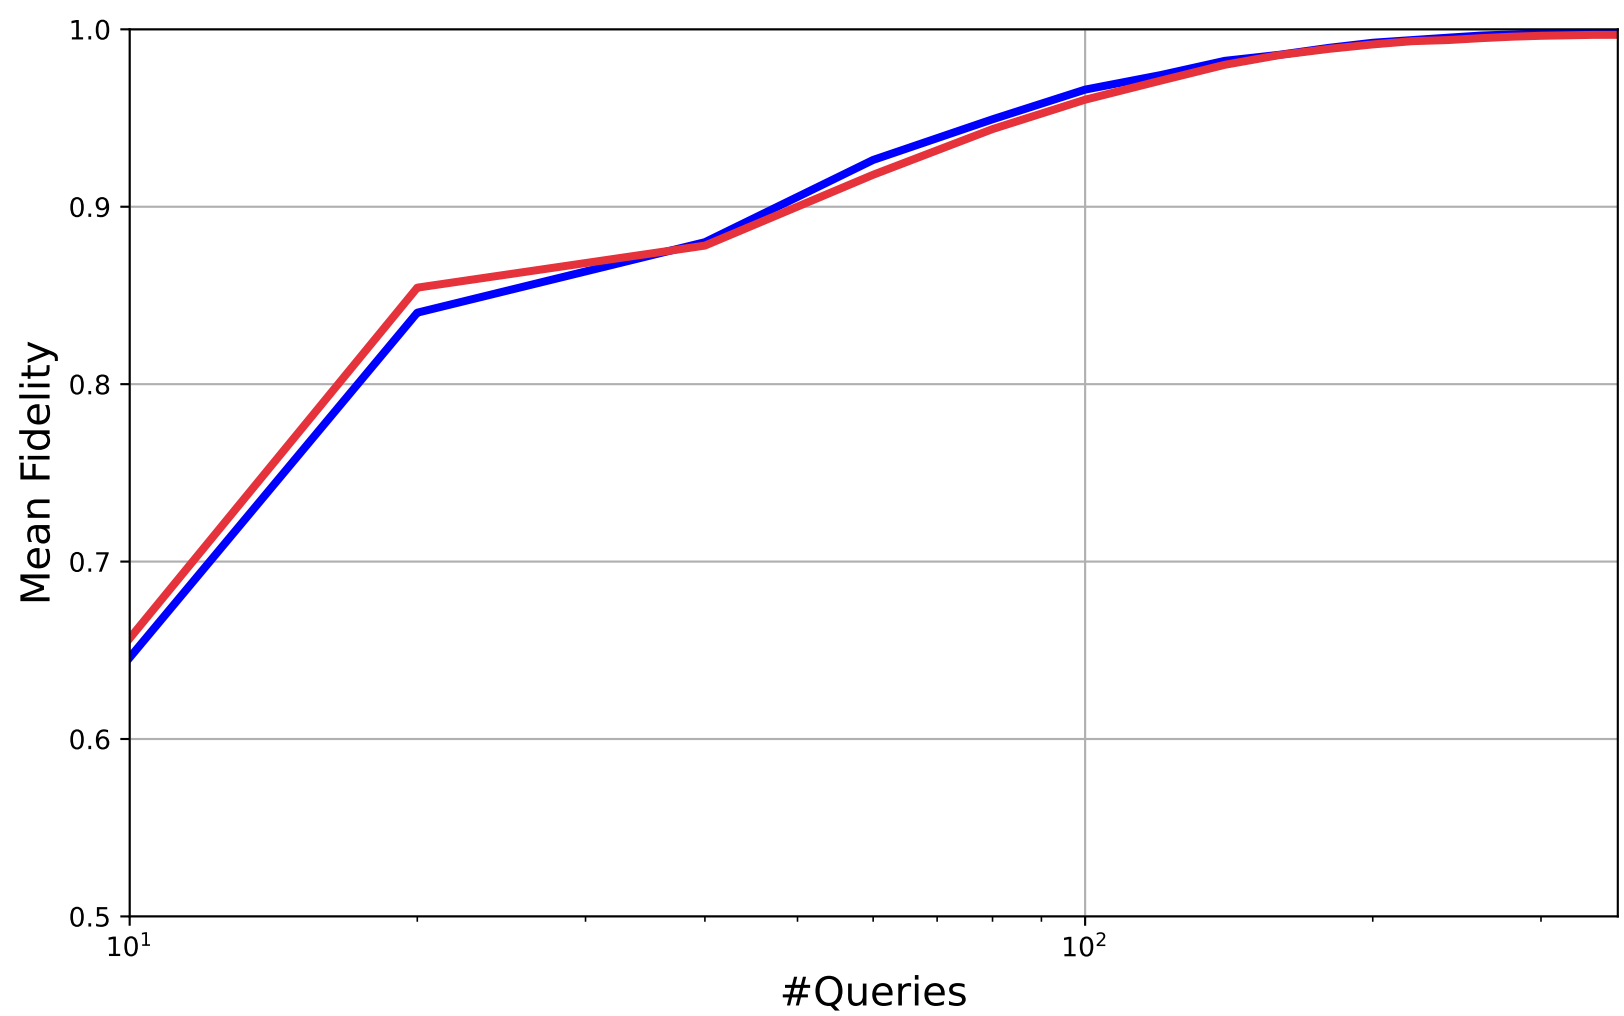

Supplement: supplementary_material [file MFvsQ_COMPAS.pdf › Tree-Extractor-Submit/experiments/plots/Heuristic/MFvsQ/MFvsQ_COMPAS.pdf]

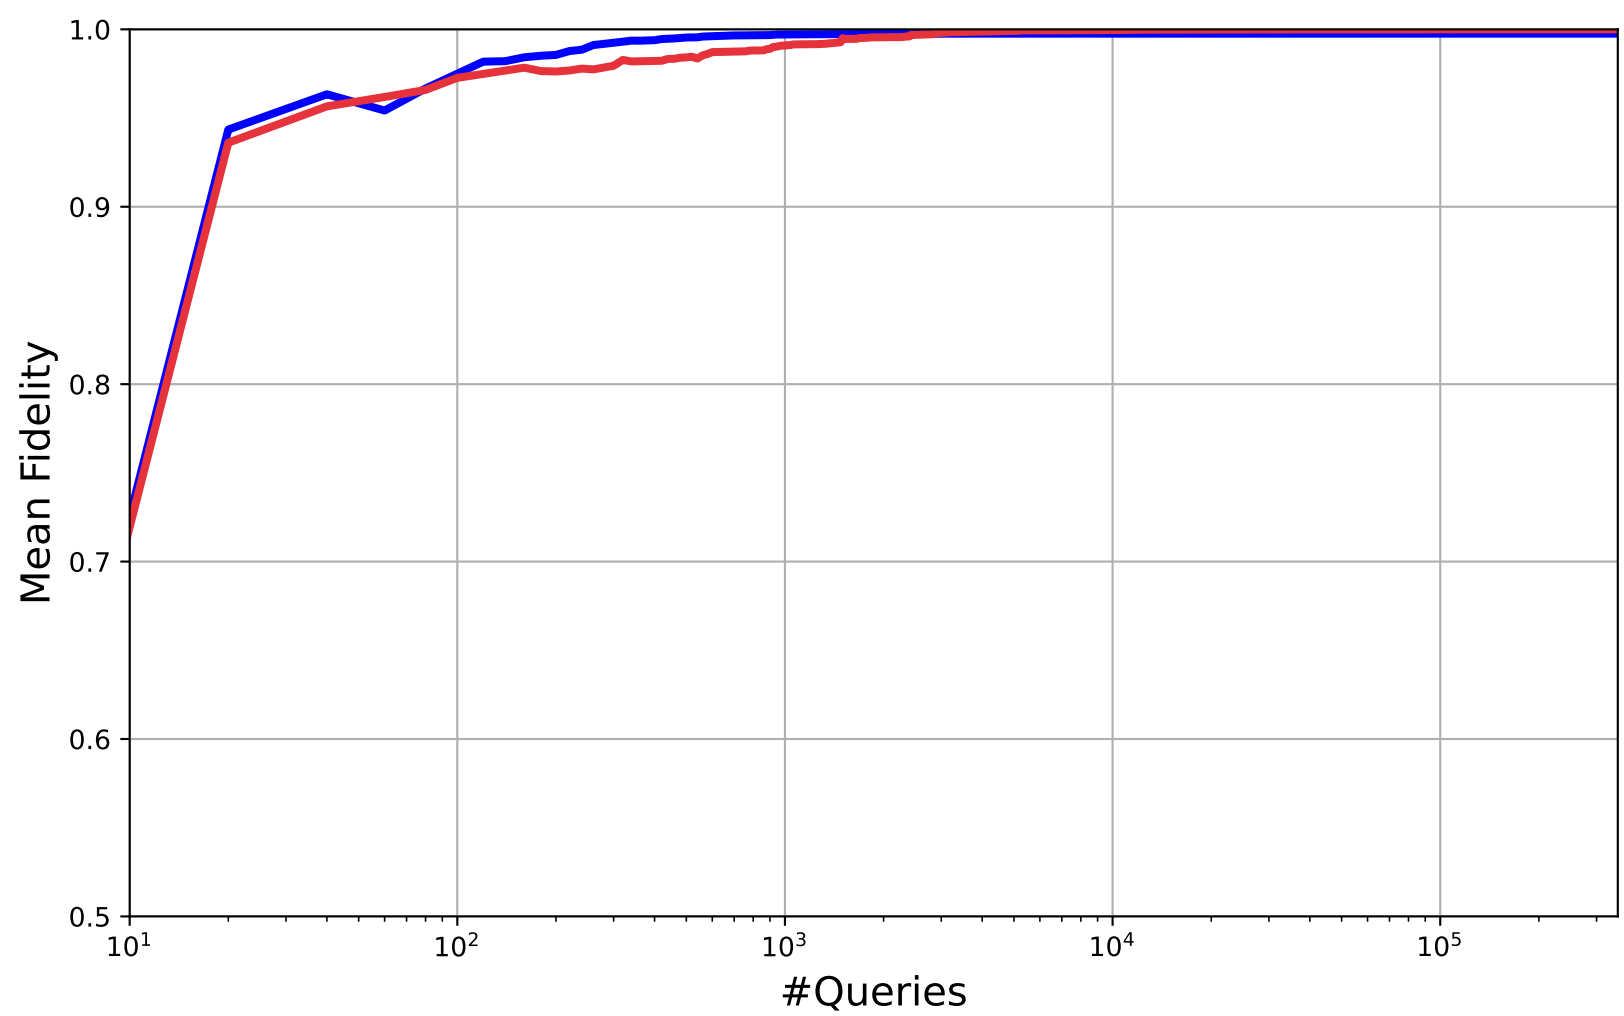

Supplement: supplementary_material [file MFvsQ_CreditCard.pdf › Tree-Extractor-Submit/experiments/plots/Heuristic/MFvsQ/MFvsQ_CreditCard.pdf]

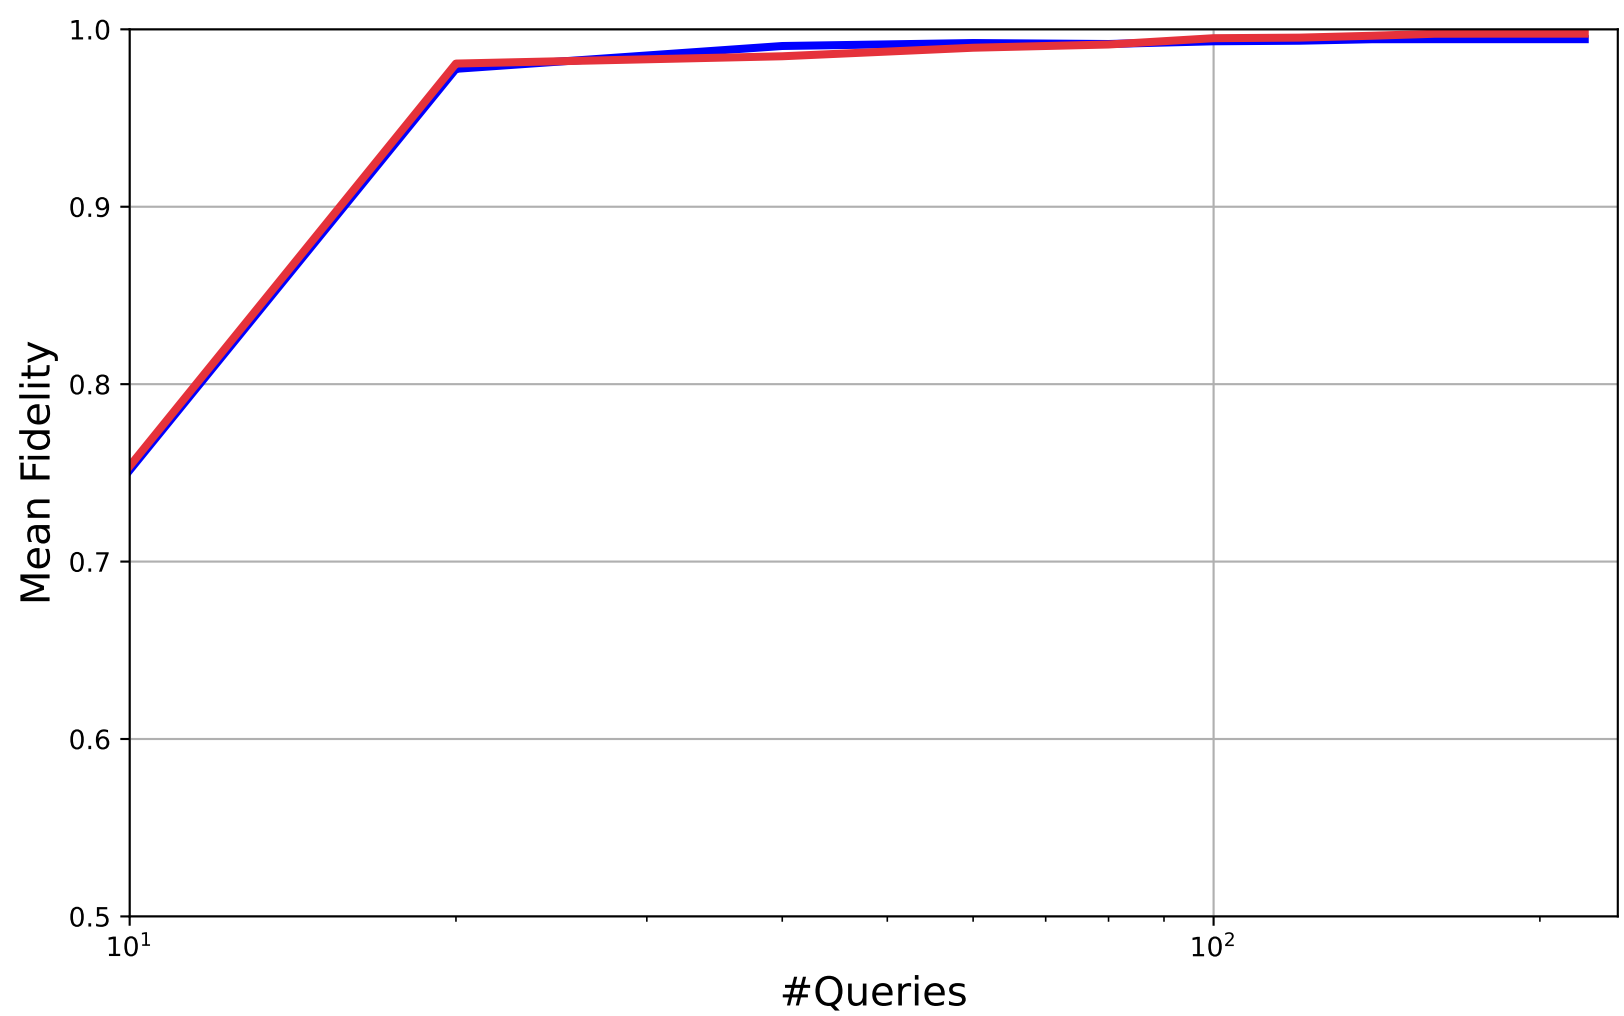

Supplement: supplementary_material [file MFvsQ_GCredit.pdf › Tree-Extractor-Submit/experiments/plots/Heuristic/MFvsQ/MFvsQ_GCredit.pdf]

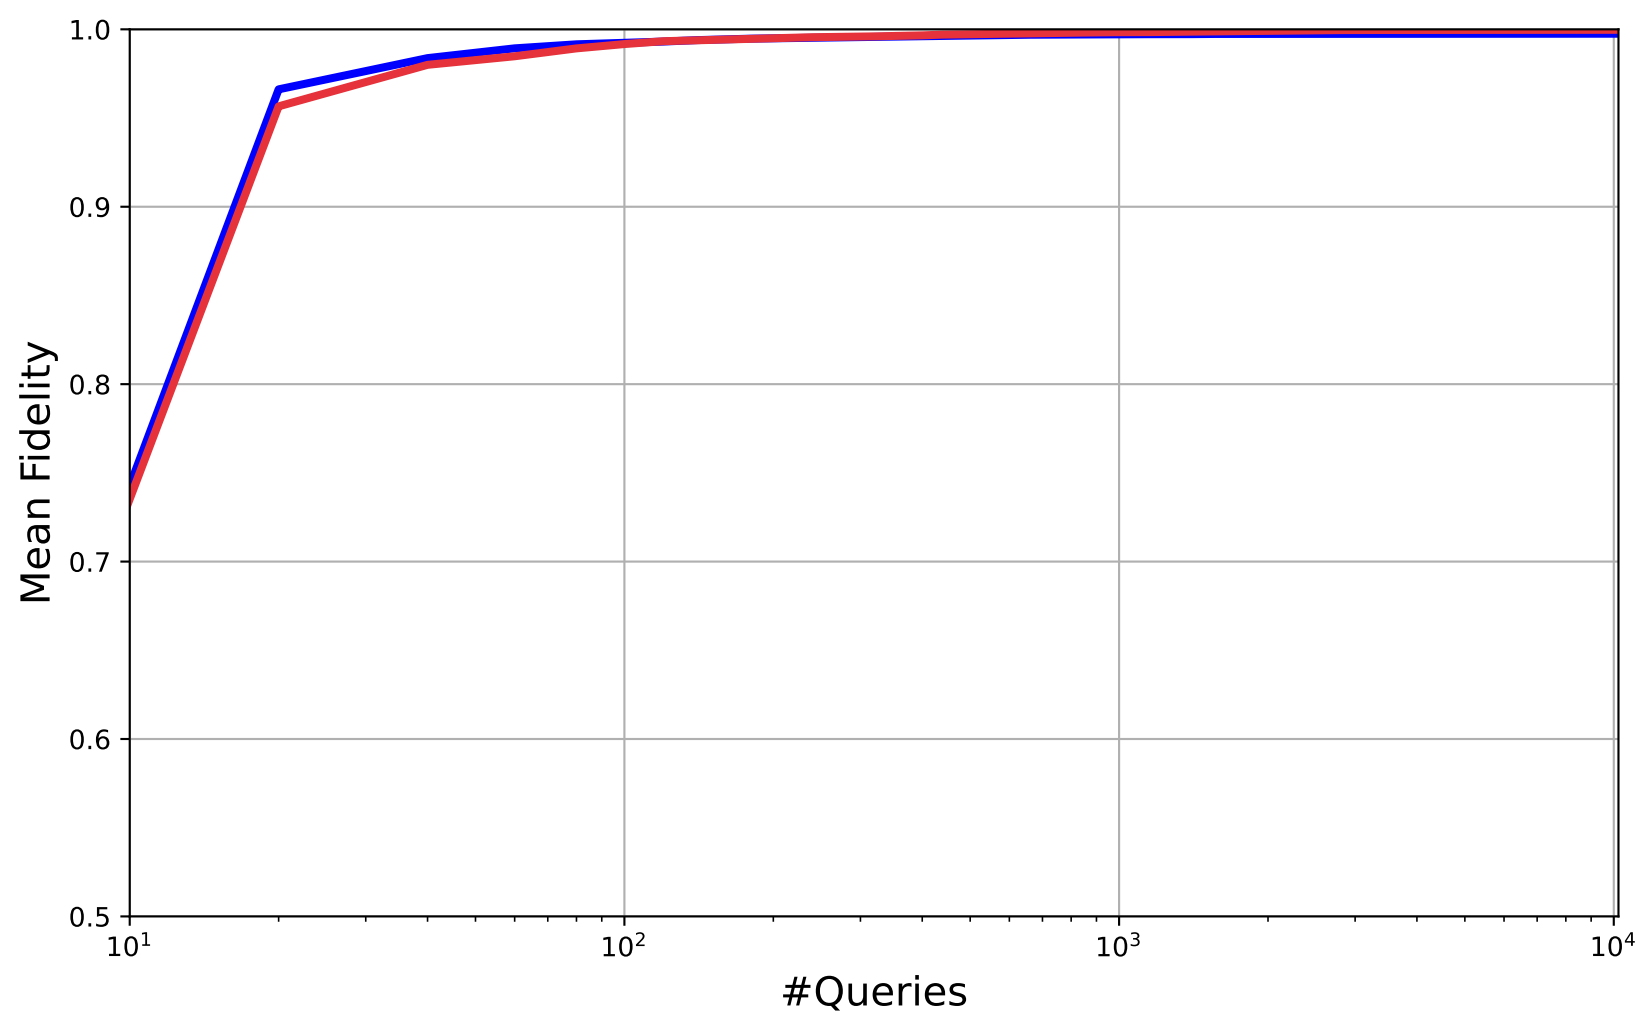

Supplement: supplementary_material [file MFvsQ_SPerformanceMAT.pdf › Tree-Extractor-Submit/experiments/plots/Heuristic/MFvsQ/MFvsQ_SPerformanceMAT.pdf]

#Queries

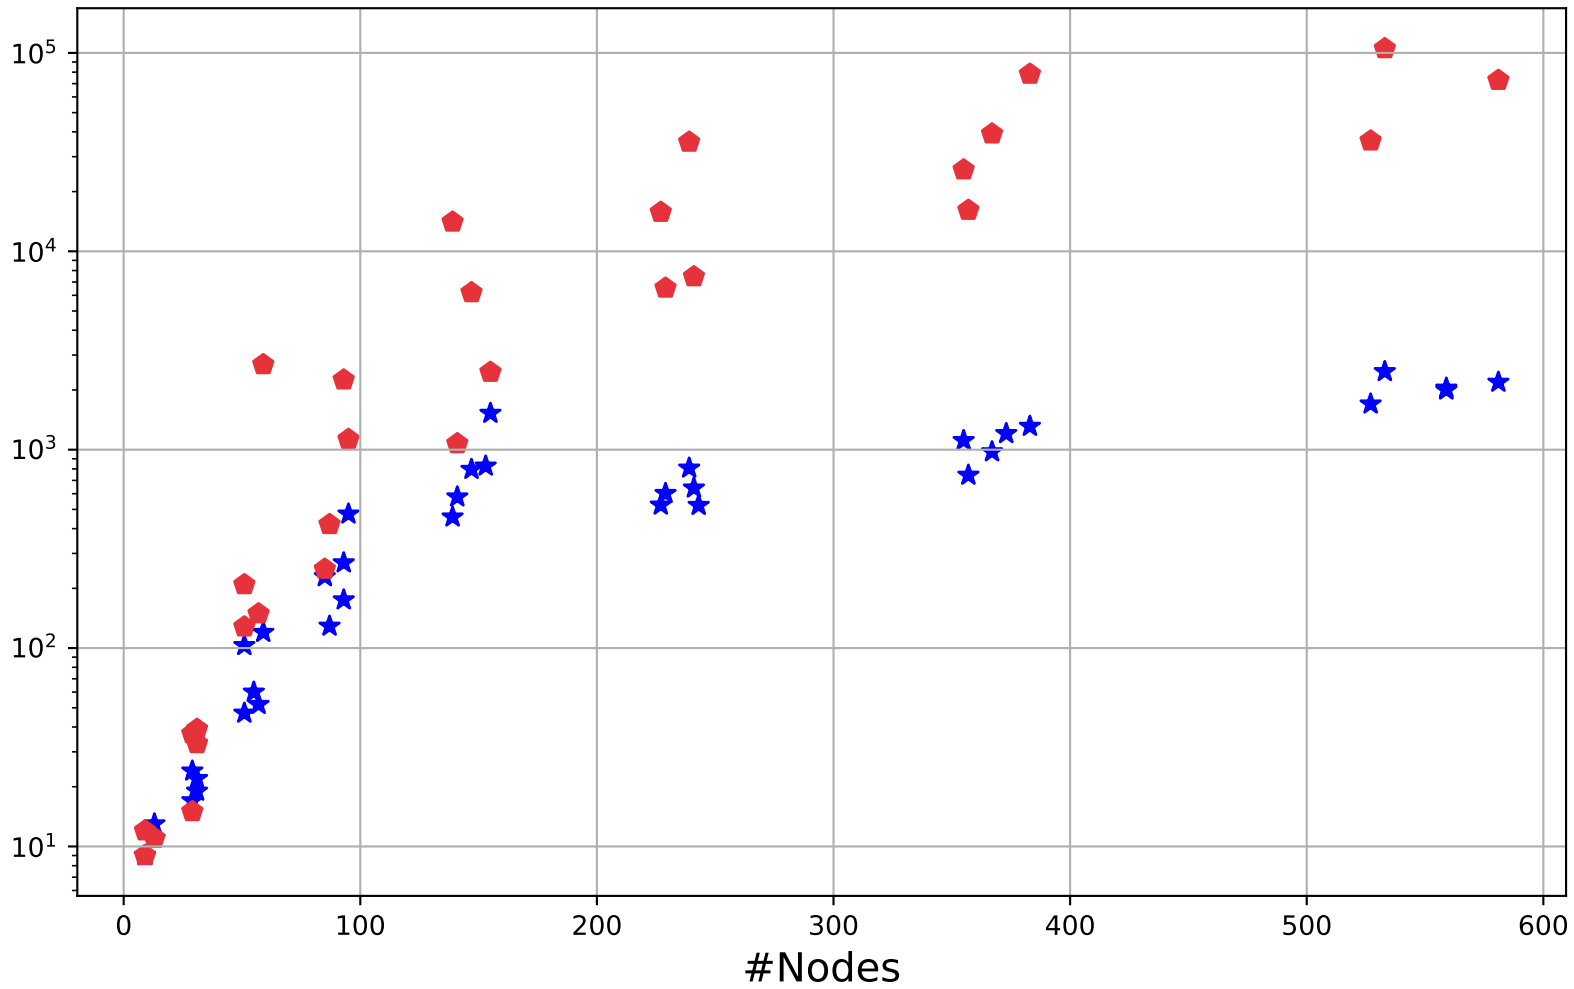

Supplement: supplementary_material [file QvsN_Adult.pdf › Tree-Extractor-Submit/experiments/plots/Heuristic/QvsN/QvsN_Adult.pdf]

#Queries

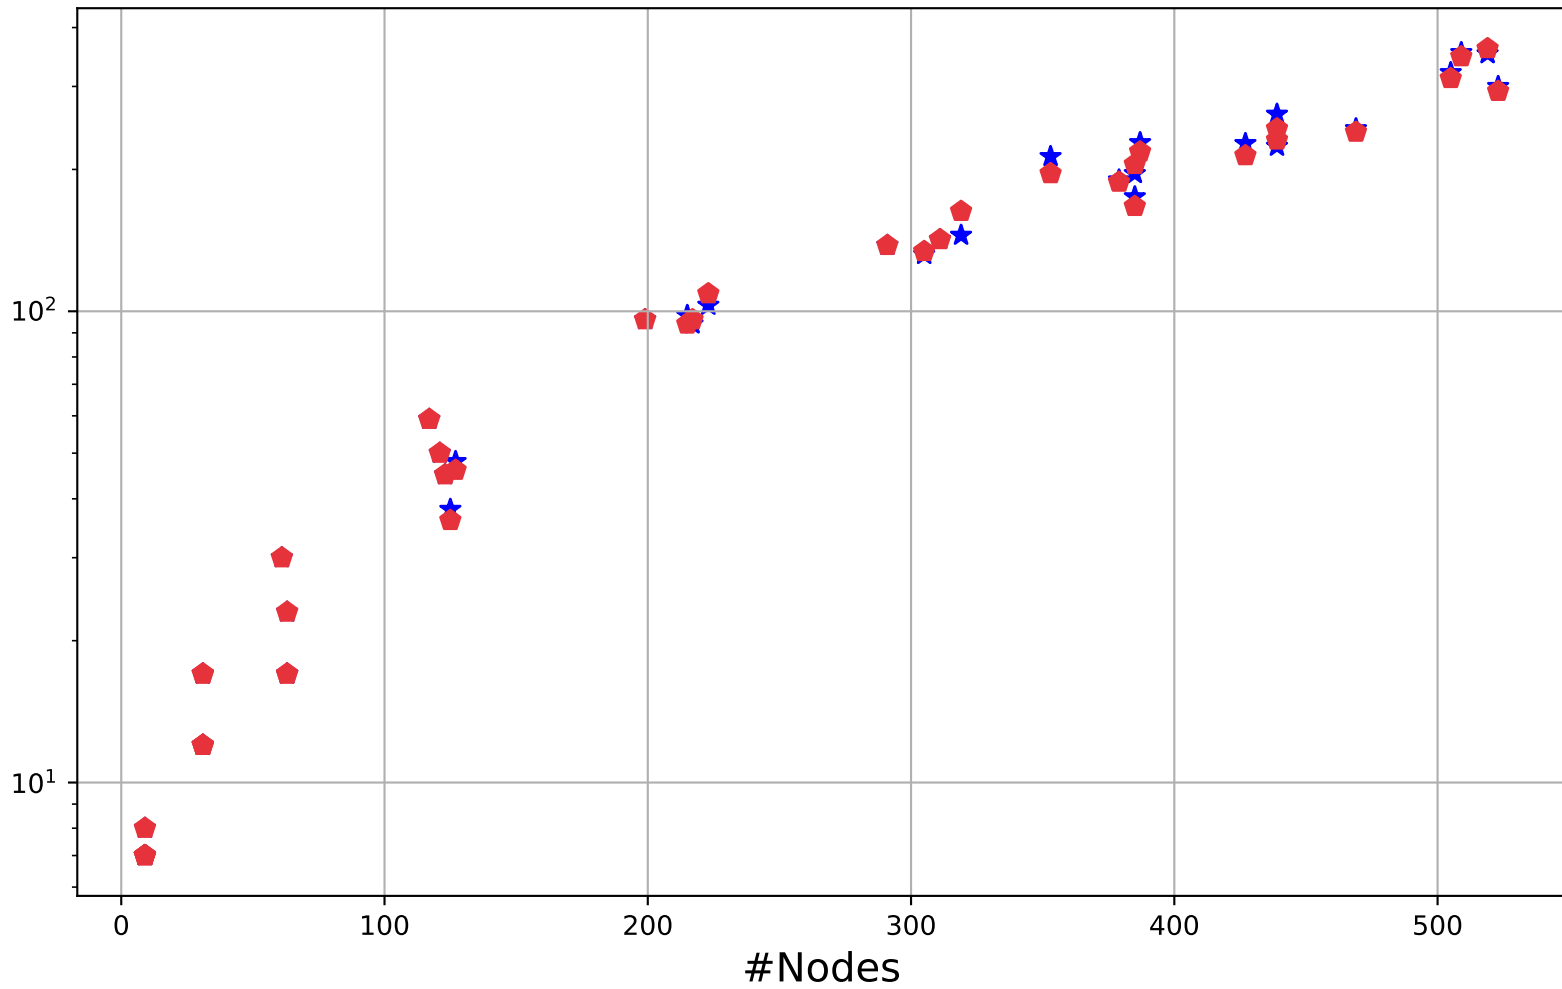

Supplement: supplementary_material [file QvsN_COMPAS.pdf › Tree-Extractor-Submit/experiments/plots/Heuristic/QvsN/QvsN_COMPAS.pdf]

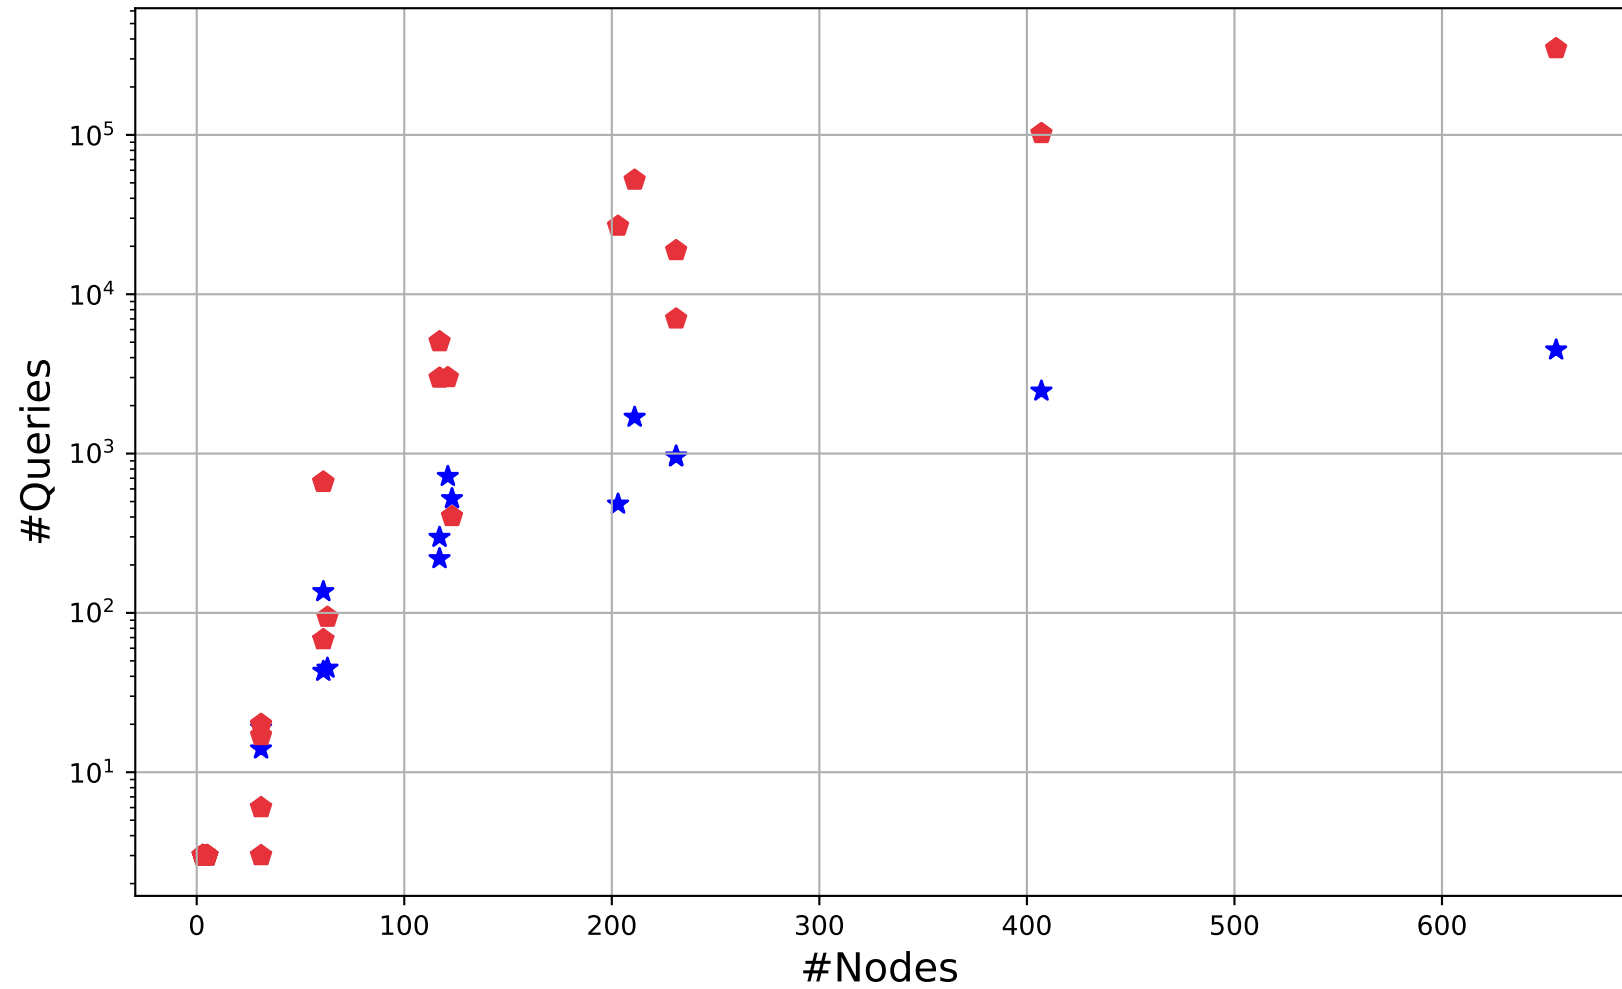

Supplement: supplementary_material [file QvsN_CreditCard.pdf › Tree-Extractor-Submit/experiments/plots/Heuristic/QvsN/QvsN_CreditCard.pdf]

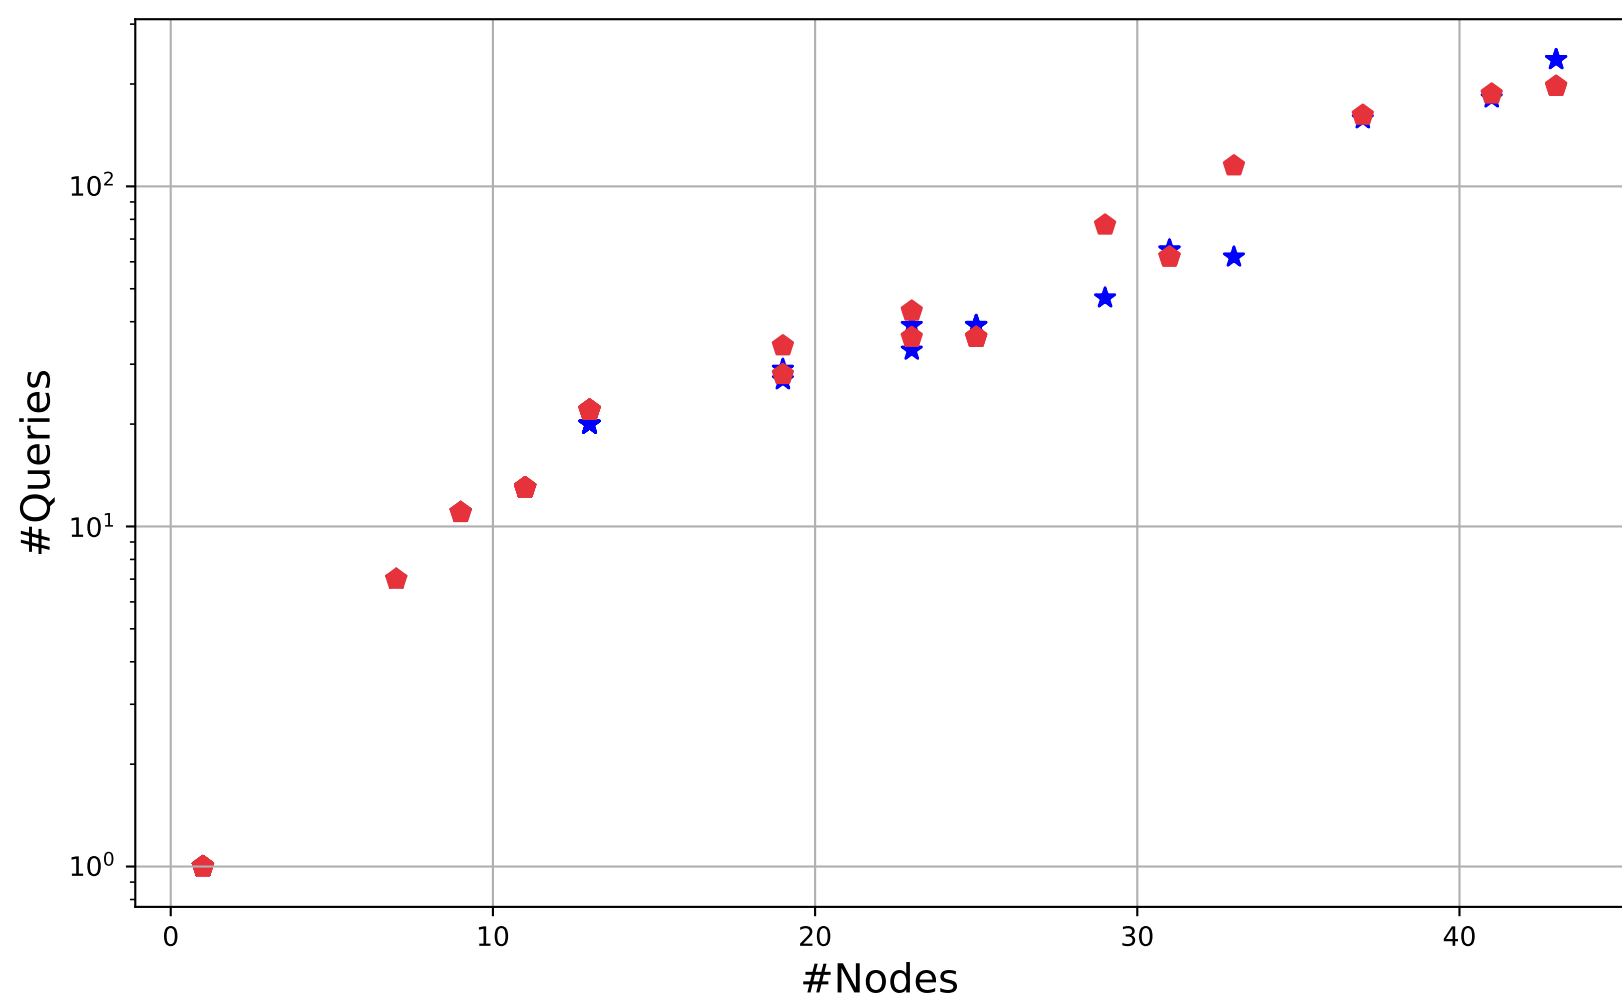

Supplement: supplementary_material [file QvsN_GCredit.pdf › Tree-Extractor-Submit/experiments/plots/Heuristic/QvsN/QvsN_GCredit.pdf]

#Queries

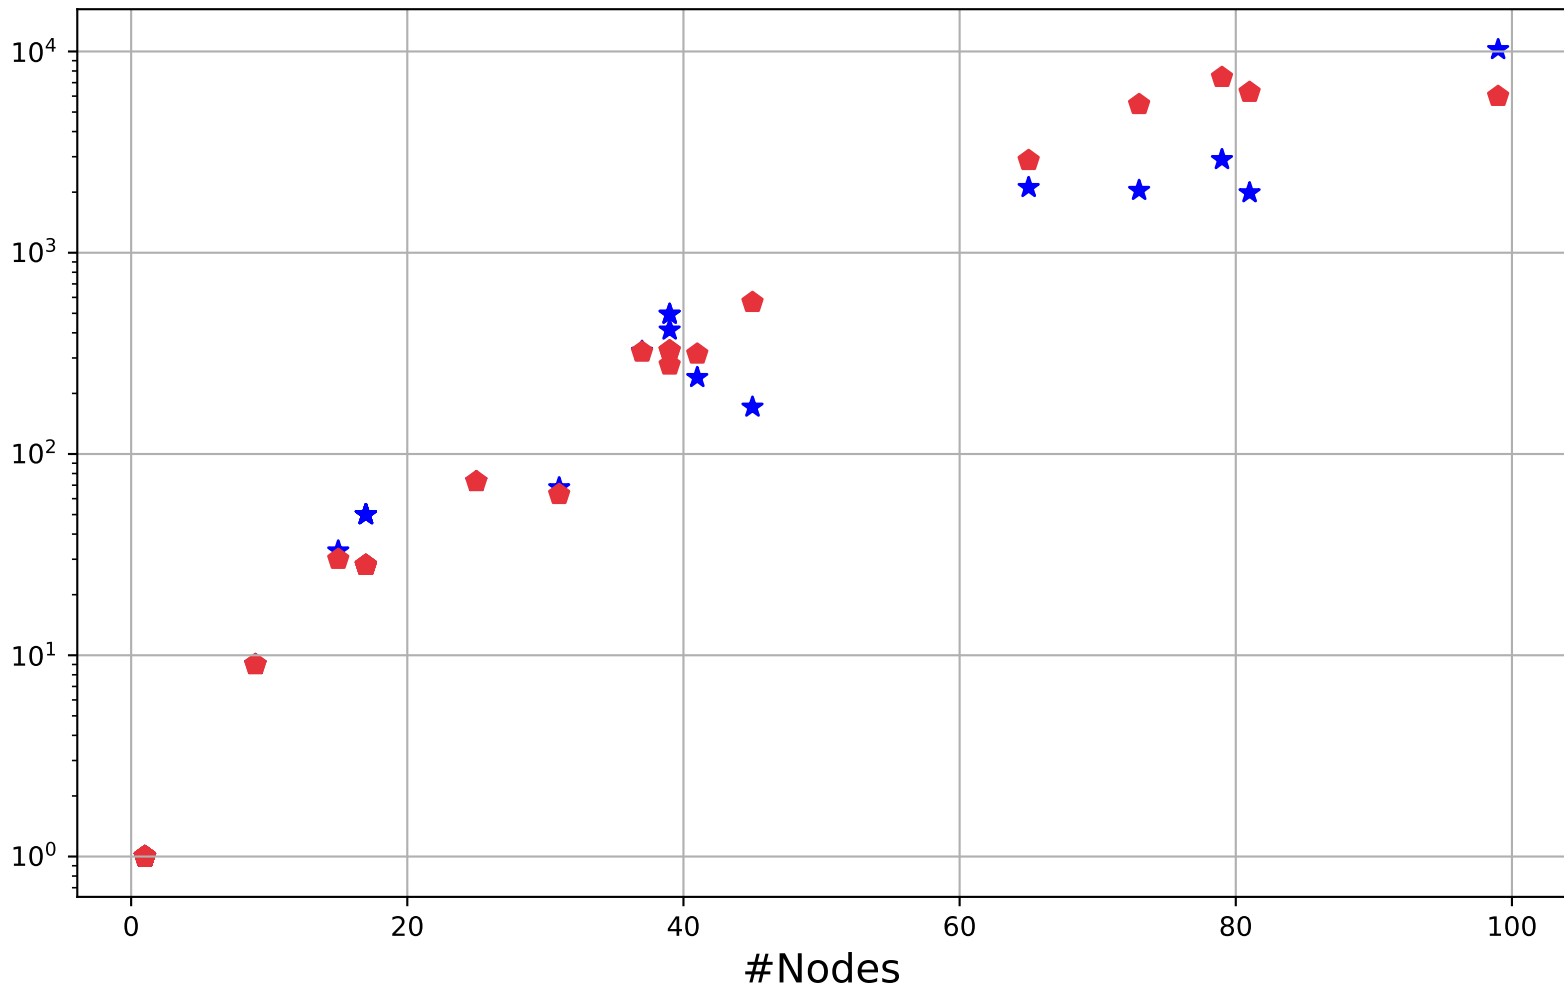

#Nodes

Supplement: supplementary_material [file QvsN_SPerformanceMAT.pdf › Tree-Extractor-Submit/experiments/plots/Heuristic/QvsN/QvsN_SPerformanceMAT.pdf]

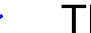

TRA\_HEURISTIC

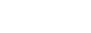

TRA\_OCEAN

Supplement: supplementary_material [file legend.pdf › Tree-Extractor-Submit/experiments/plots/Heuristic/QvsN/legend.pdf]

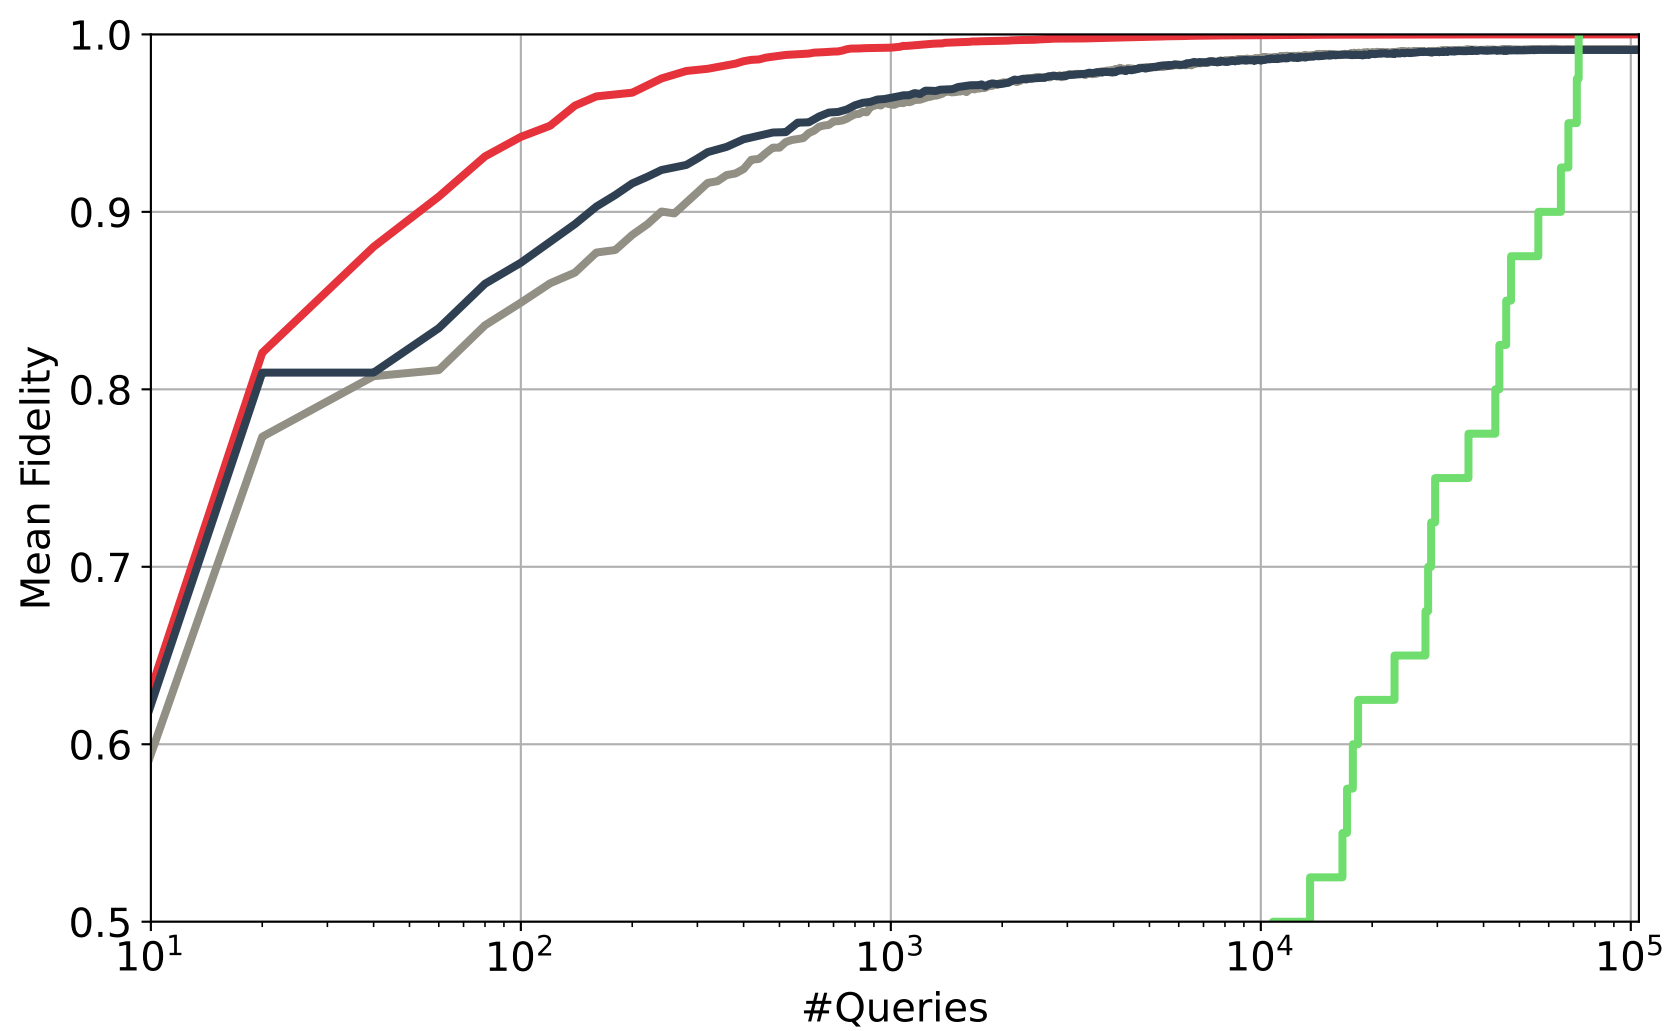

Supplement: supplementary_material [file MFvsQ_Adult.pdf › Tree-Extractor-Submit/experiments/plots/MFvsQ/MFvsQ_Adult.pdf]

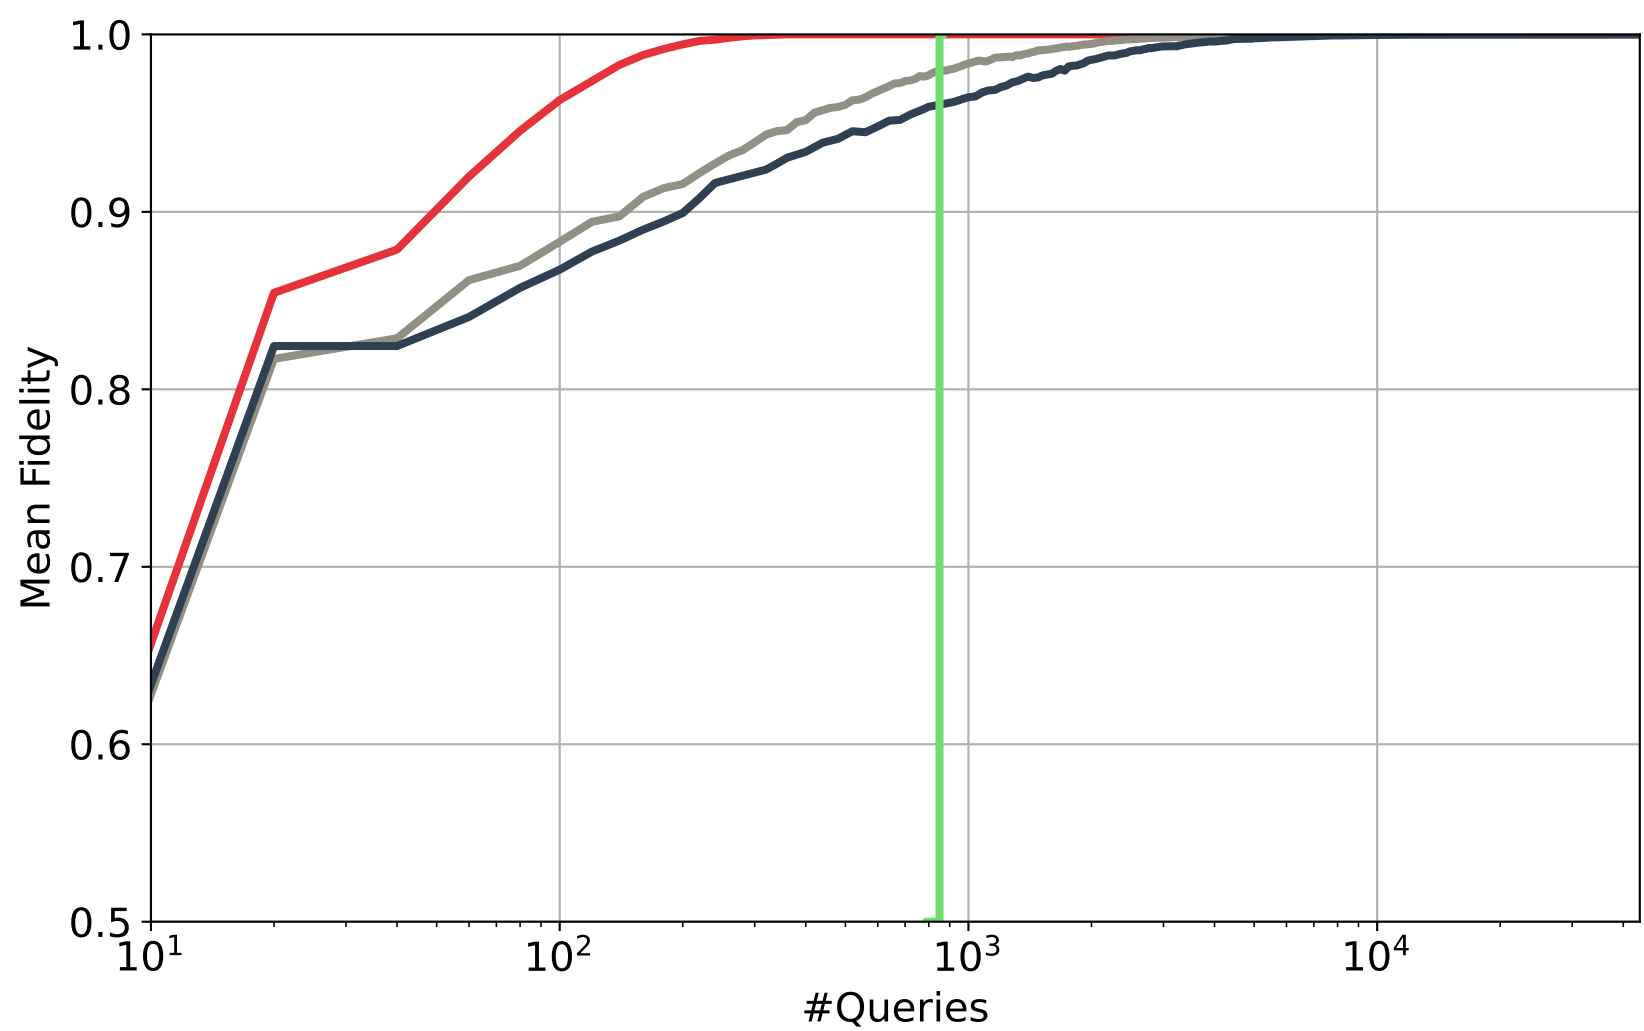

Supplement: supplementary_material [file MFvsQ_COMPAS.pdf › Tree-Extractor-Submit/experiments/plots/MFvsQ/MFvsQ_COMPAS.pdf]

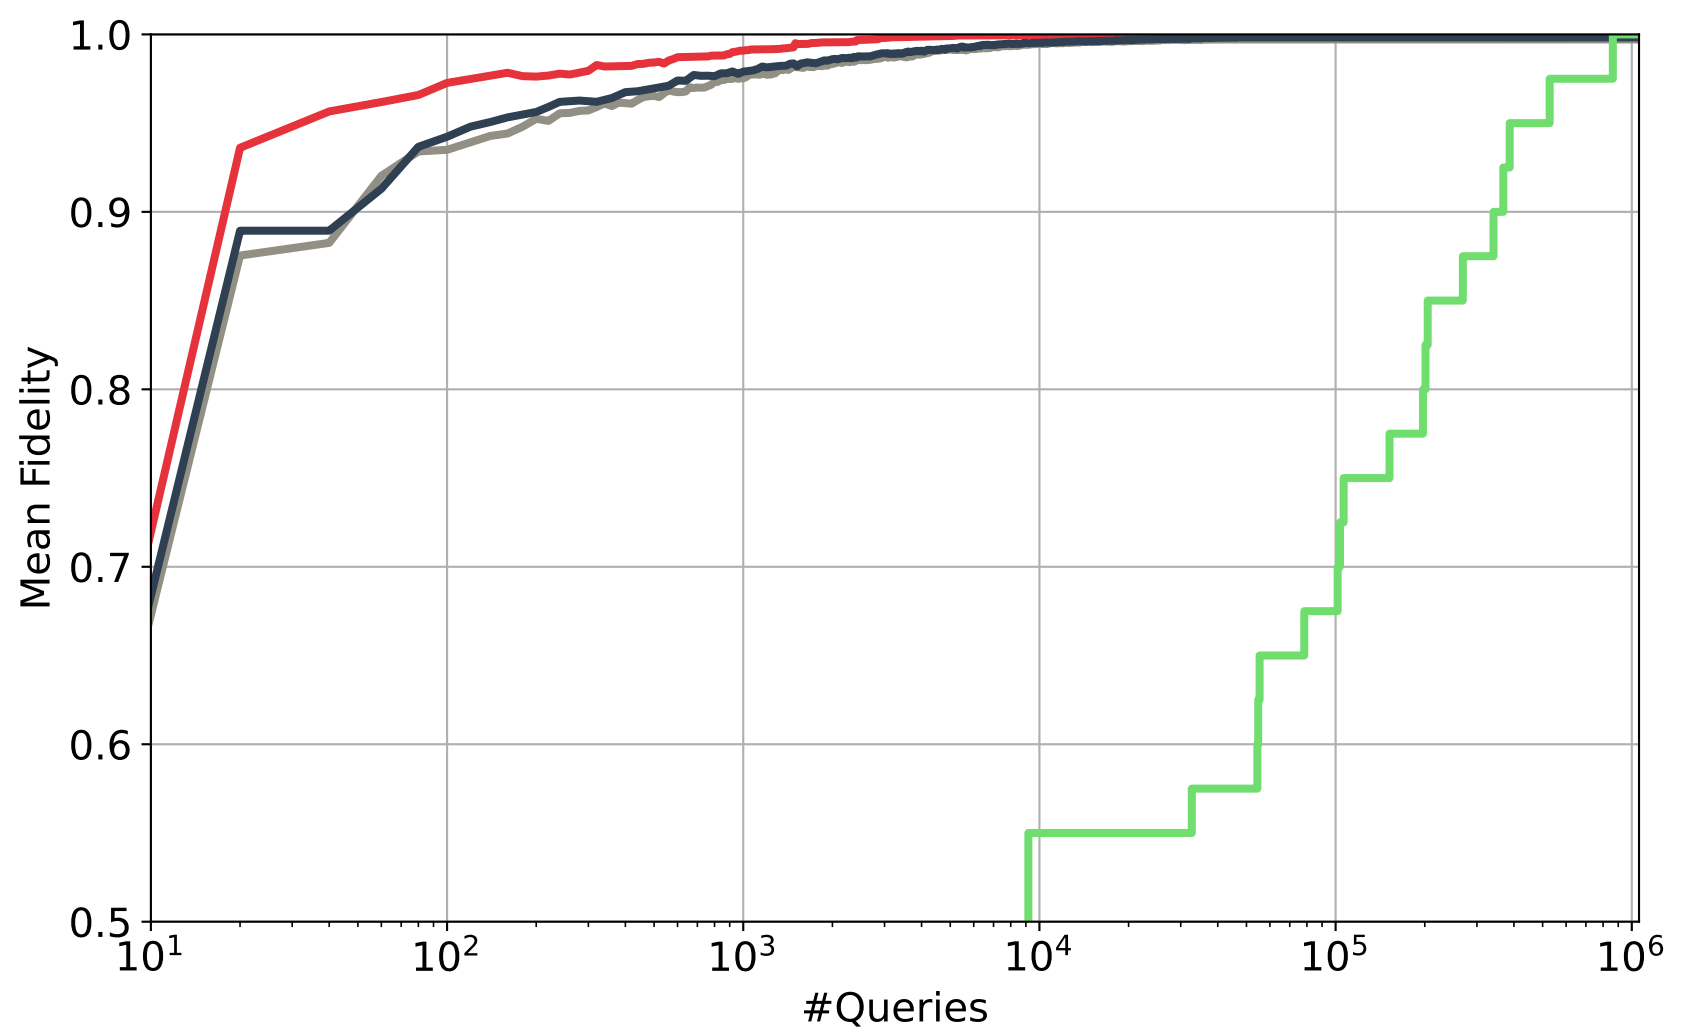

Supplement: supplementary_material [file MFvsQ_CreditCard.pdf › Tree-Extractor-Submit/experiments/plots/MFvsQ/MFvsQ_CreditCard.pdf]

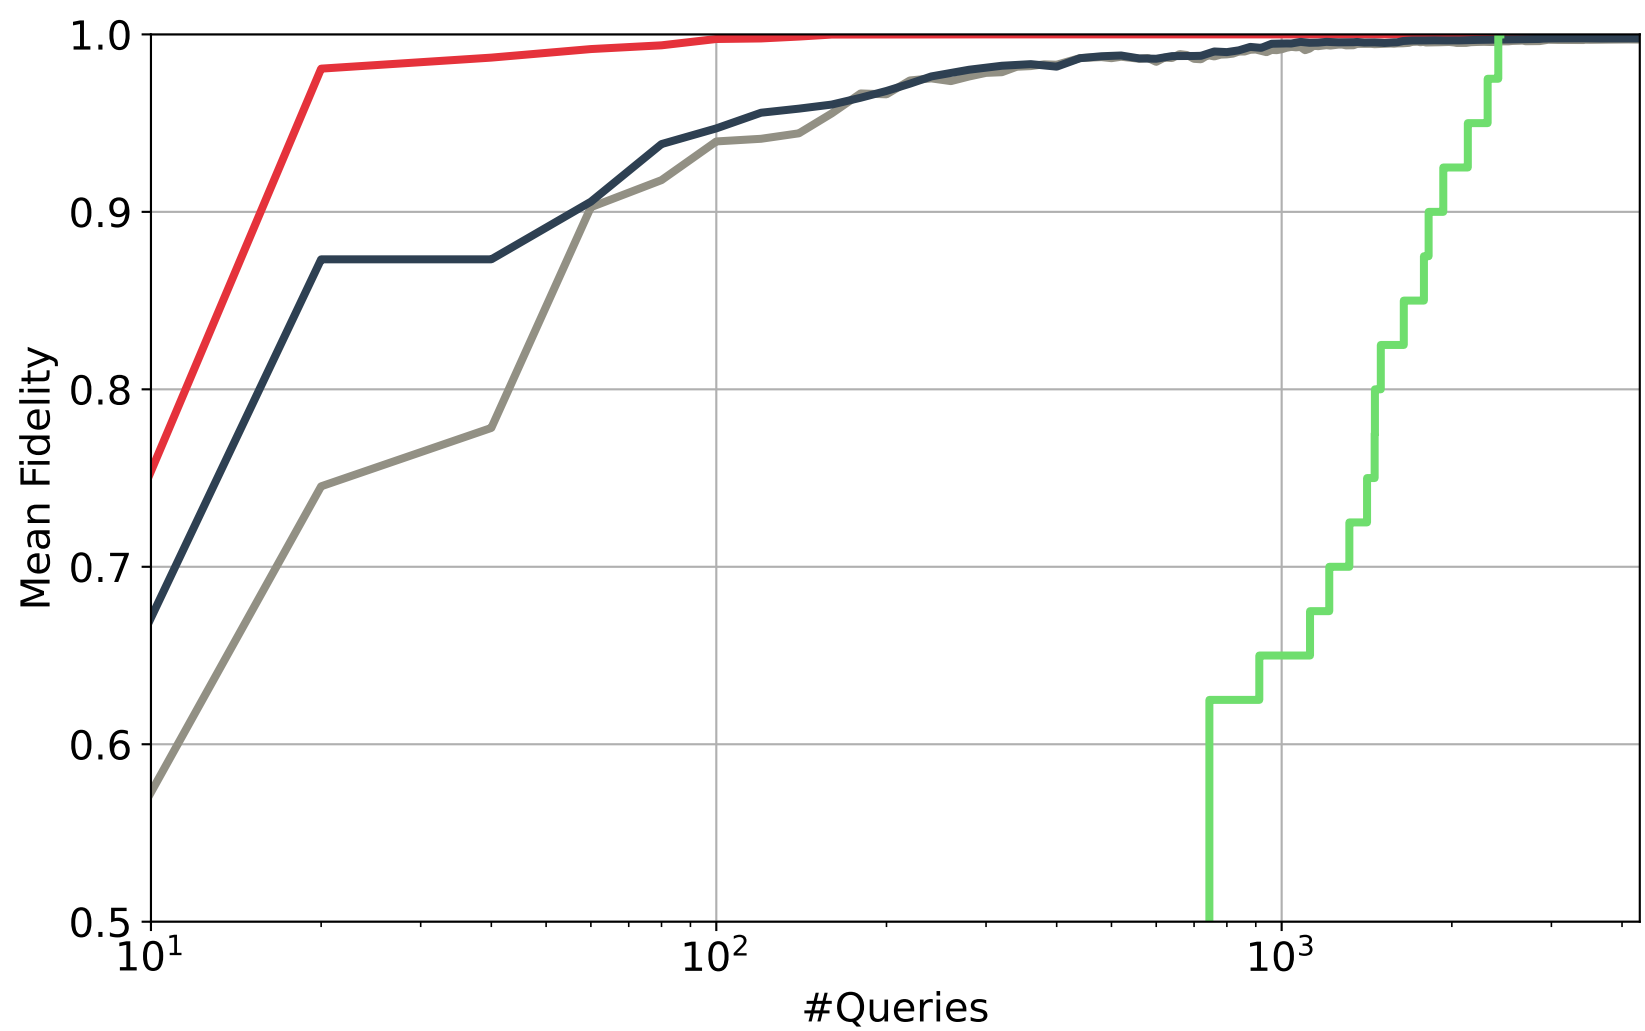

Supplement: supplementary_material [file MFvsQ_GCredit.pdf › Tree-Extractor-Submit/experiments/plots/MFvsQ/MFvsQ_GCredit.pdf]

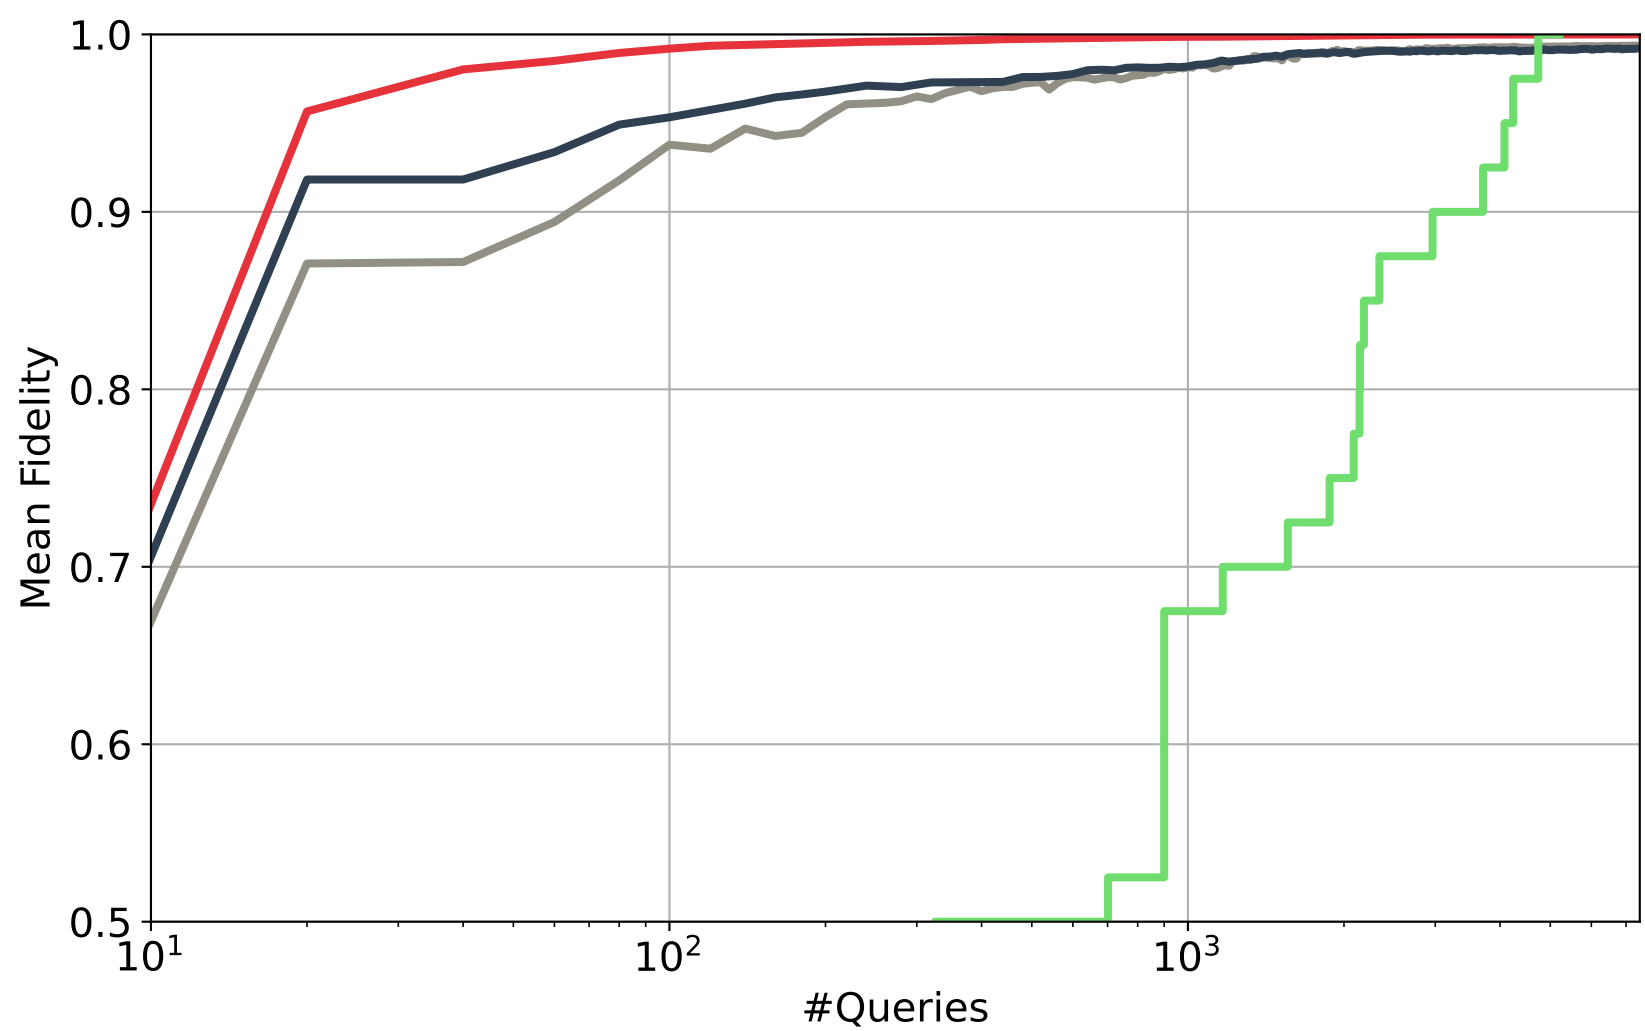

Supplement: supplementary_material [file MFvsQ_SPerformanceMAT.pdf › Tree-Extractor-Submit/experiments/plots/MFvsQ/MFvsQ_SPerformanceMAT.pdf]

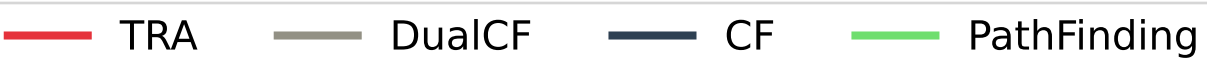

Supplement: supplementary_material [file legend.pdf › Tree-Extractor-Submit/experiments/plots/MFvsQ/legend.pdf]

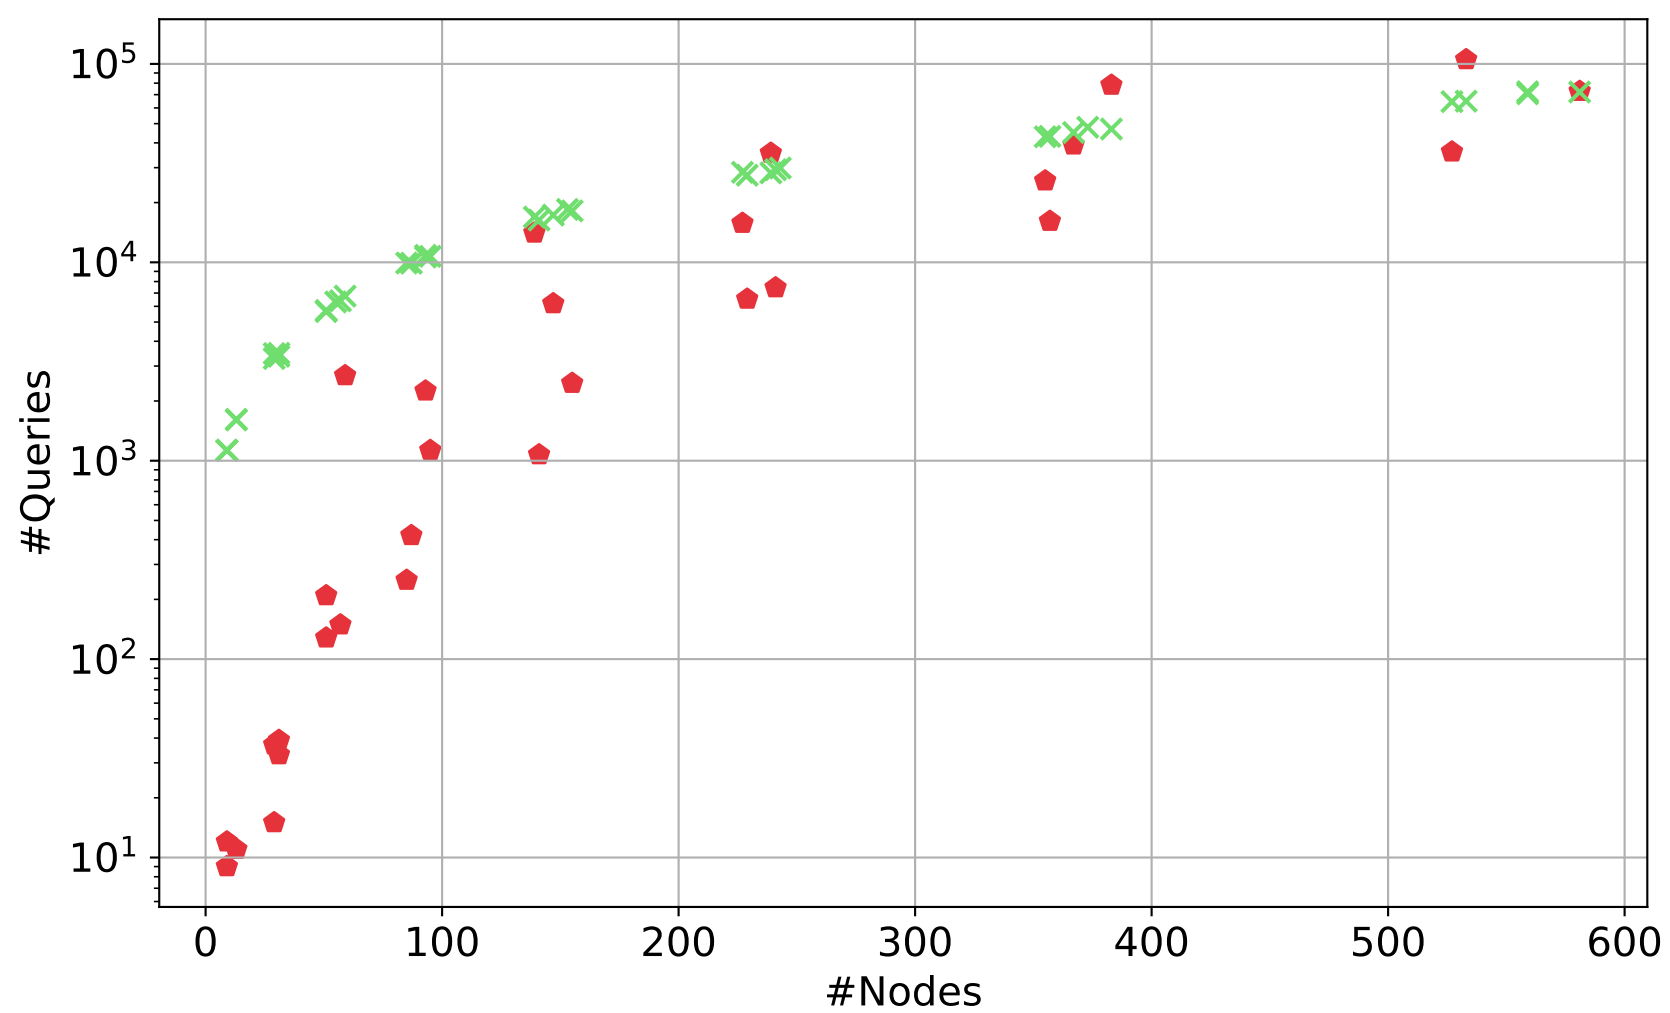

Supplement: supplementary_material [file QvsN_Adult.pdf › Tree-Extractor-Submit/experiments/plots/QvsN/QvsN_Adult.pdf]

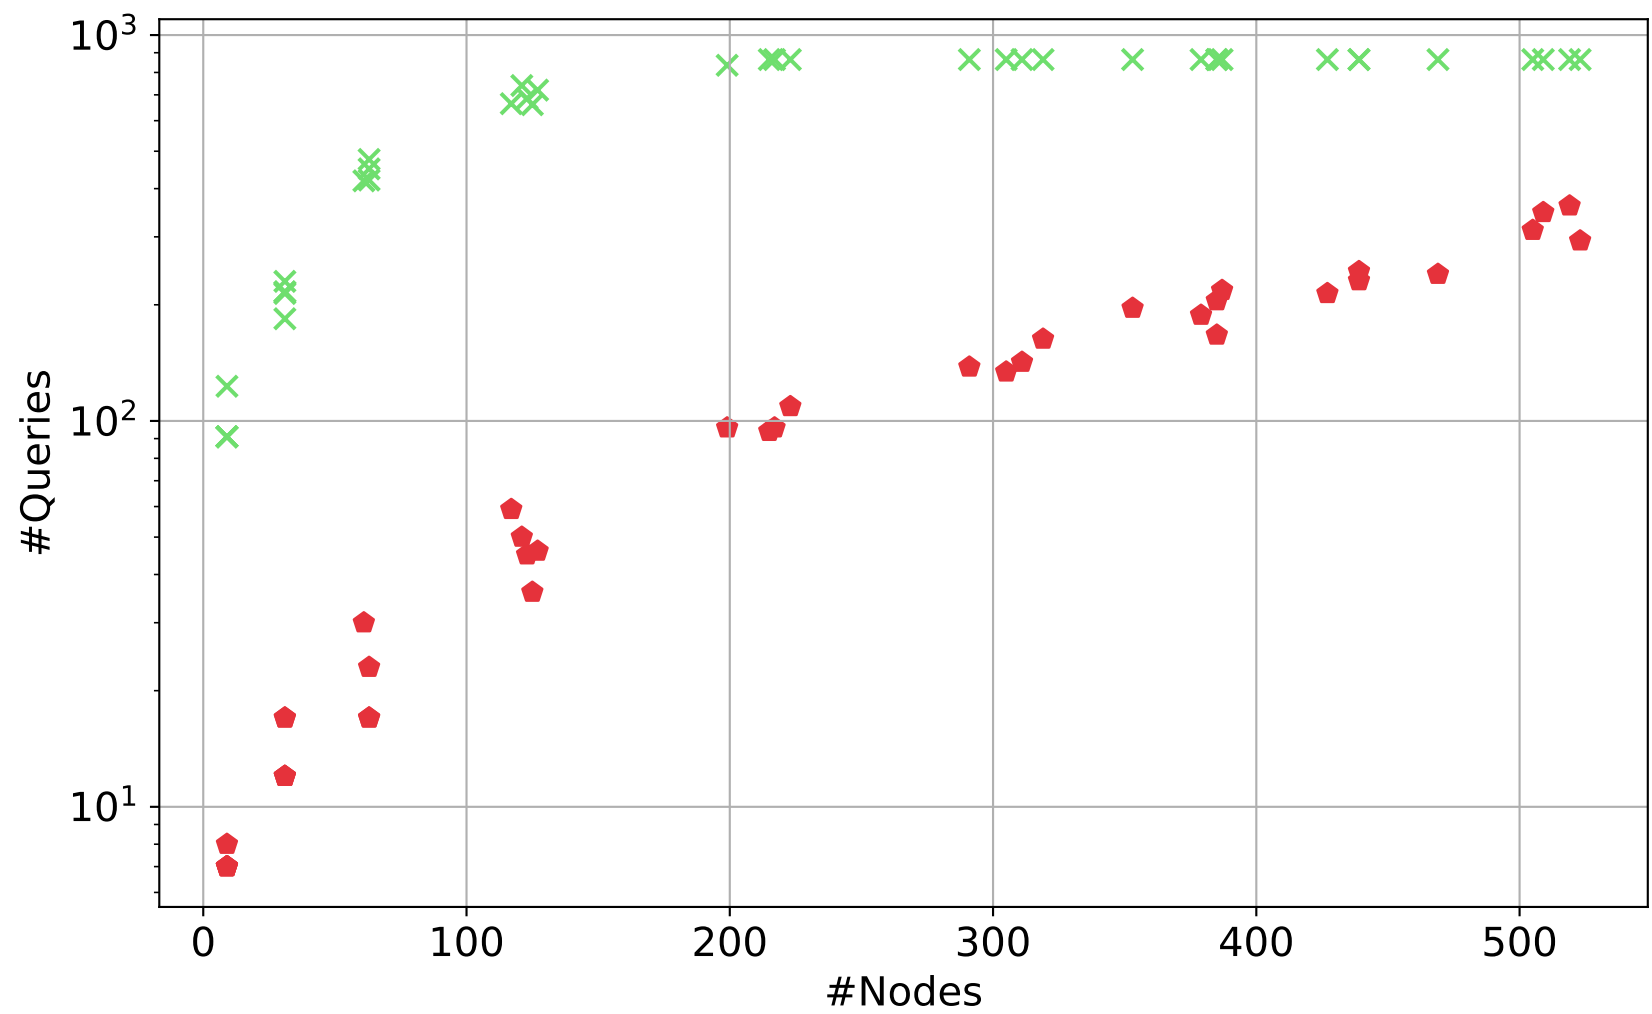

Supplement: supplementary_material [file QvsN_COMPAS.pdf › Tree-Extractor-Submit/experiments/plots/QvsN/QvsN_COMPAS.pdf]

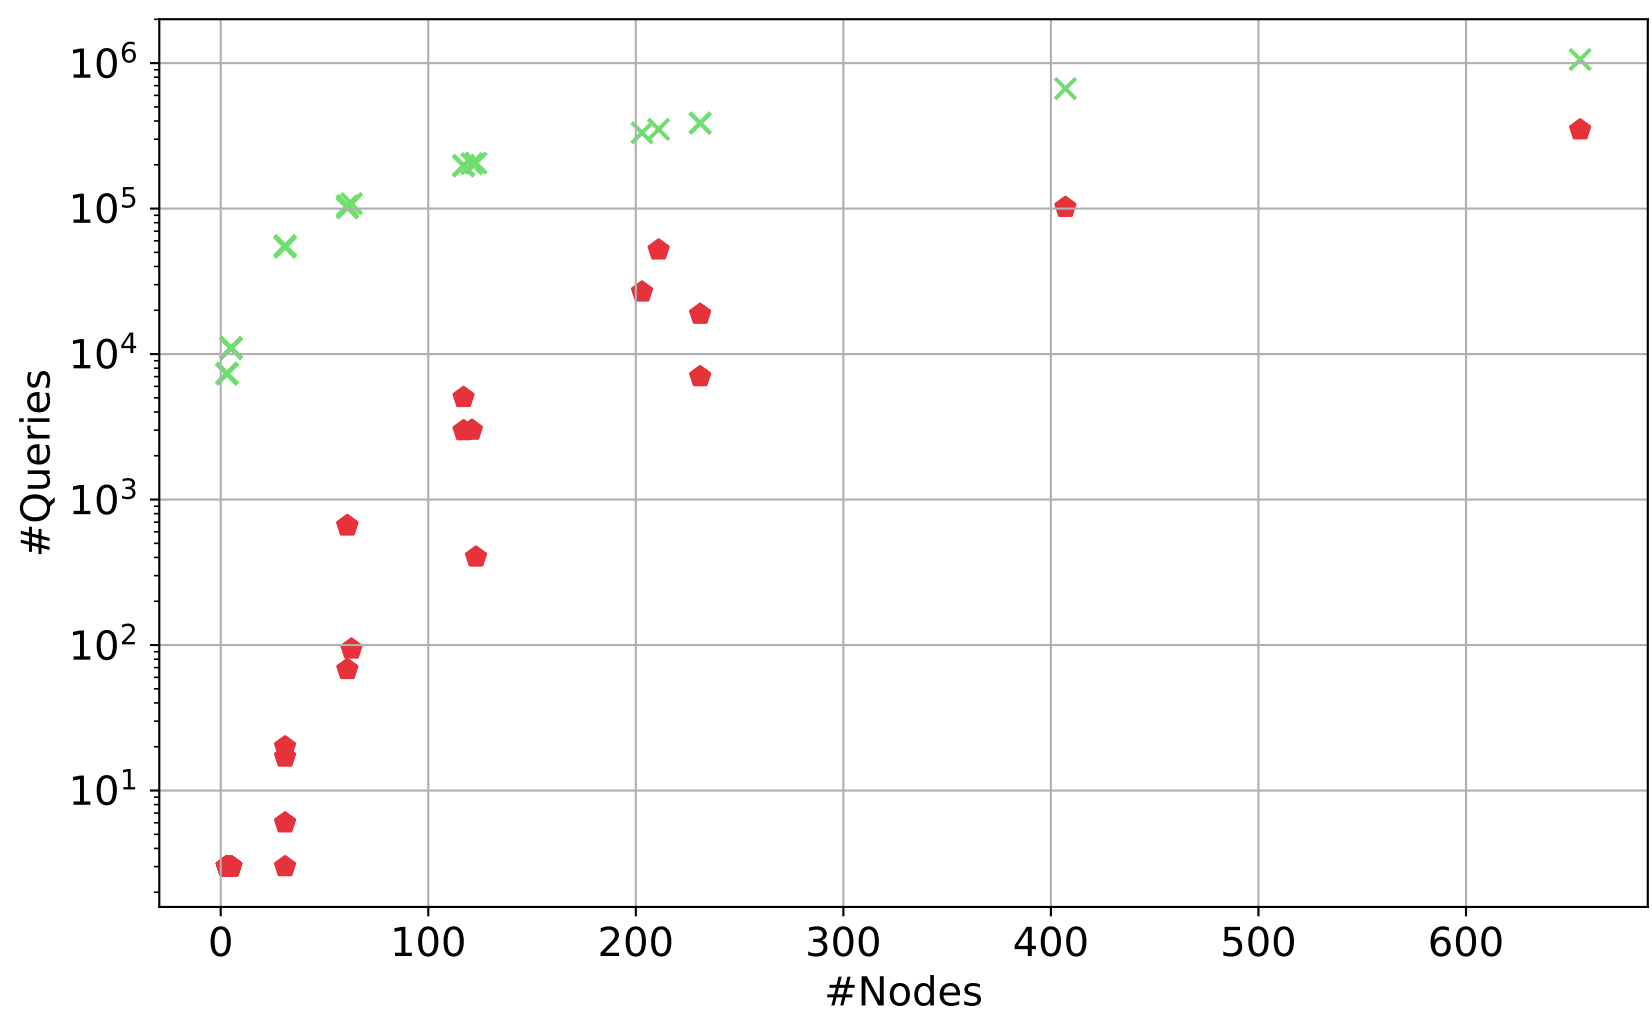

Supplement: supplementary_material [file QvsN_CreditCard.pdf › Tree-Extractor-Submit/experiments/plots/QvsN/QvsN_CreditCard.pdf]

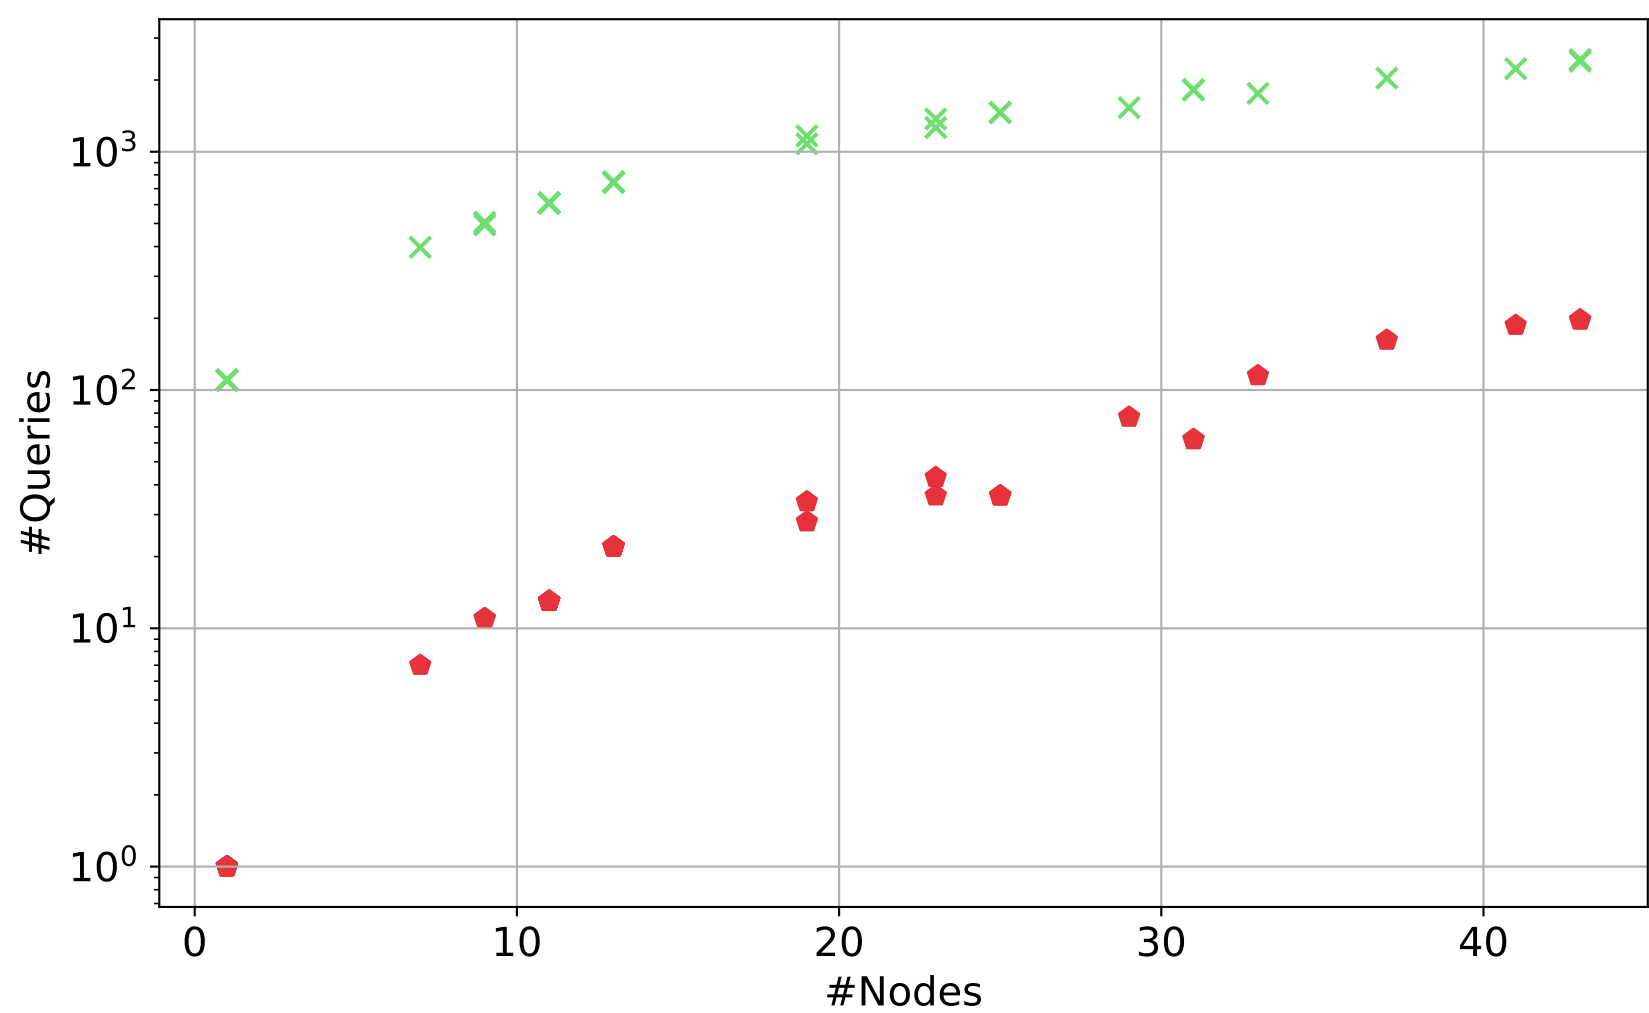

Supplement: supplementary_material [file QvsN_GCredit.pdf › Tree-Extractor-Submit/experiments/plots/QvsN/QvsN_GCredit.pdf]

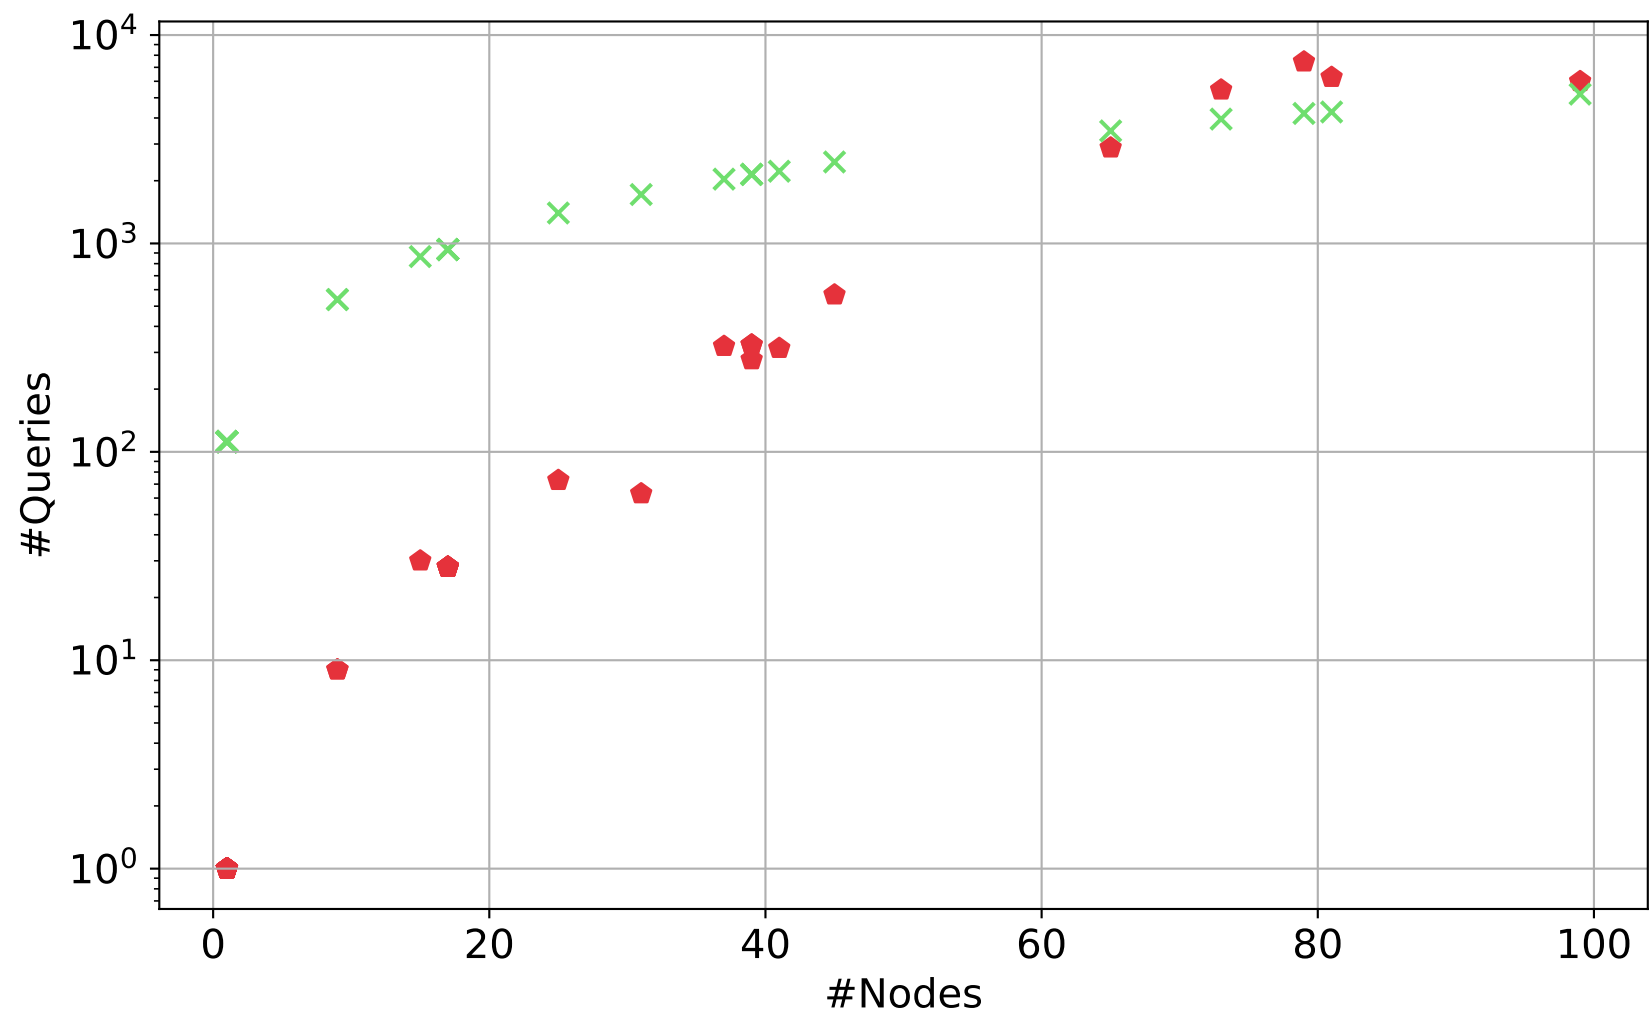

Supplement: supplementary_material [file QvsN_SPerformanceMAT.pdf › Tree-Extractor-Submit/experiments/plots/QvsN/QvsN_SPerformanceMAT.pdf]

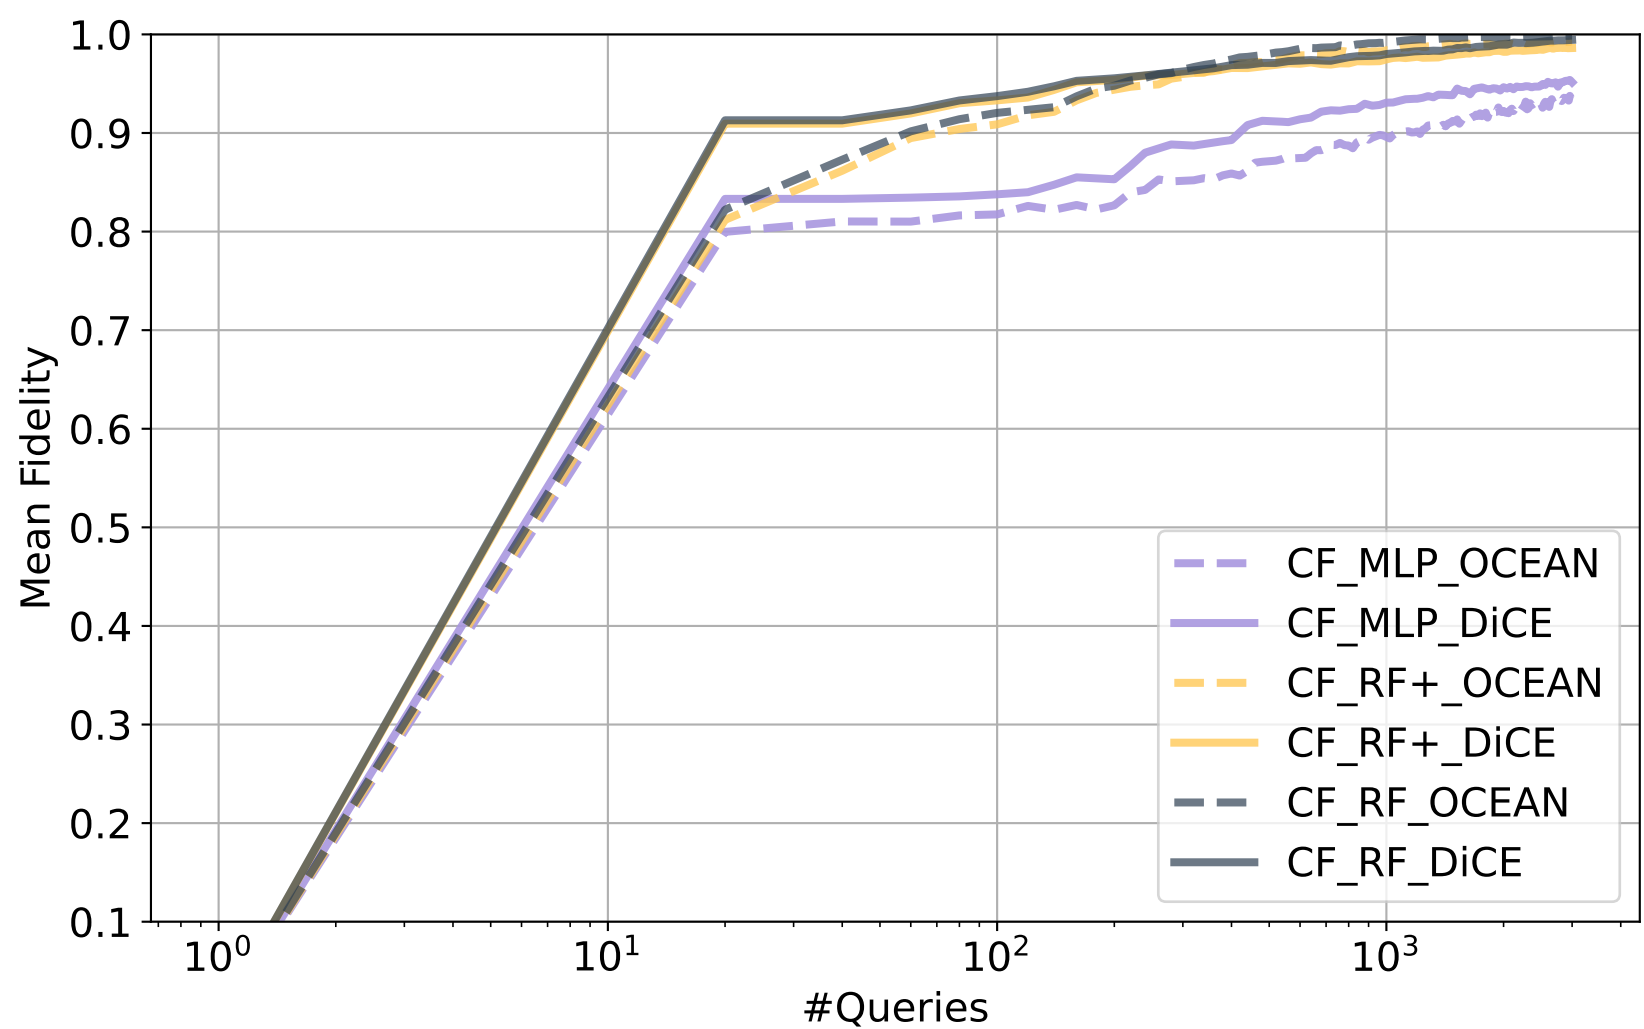

Supplement: supplementary_material [file RF_CF.pdf › Tree-Extractor-Submit/experiments/plots/RF_CF.pdf]

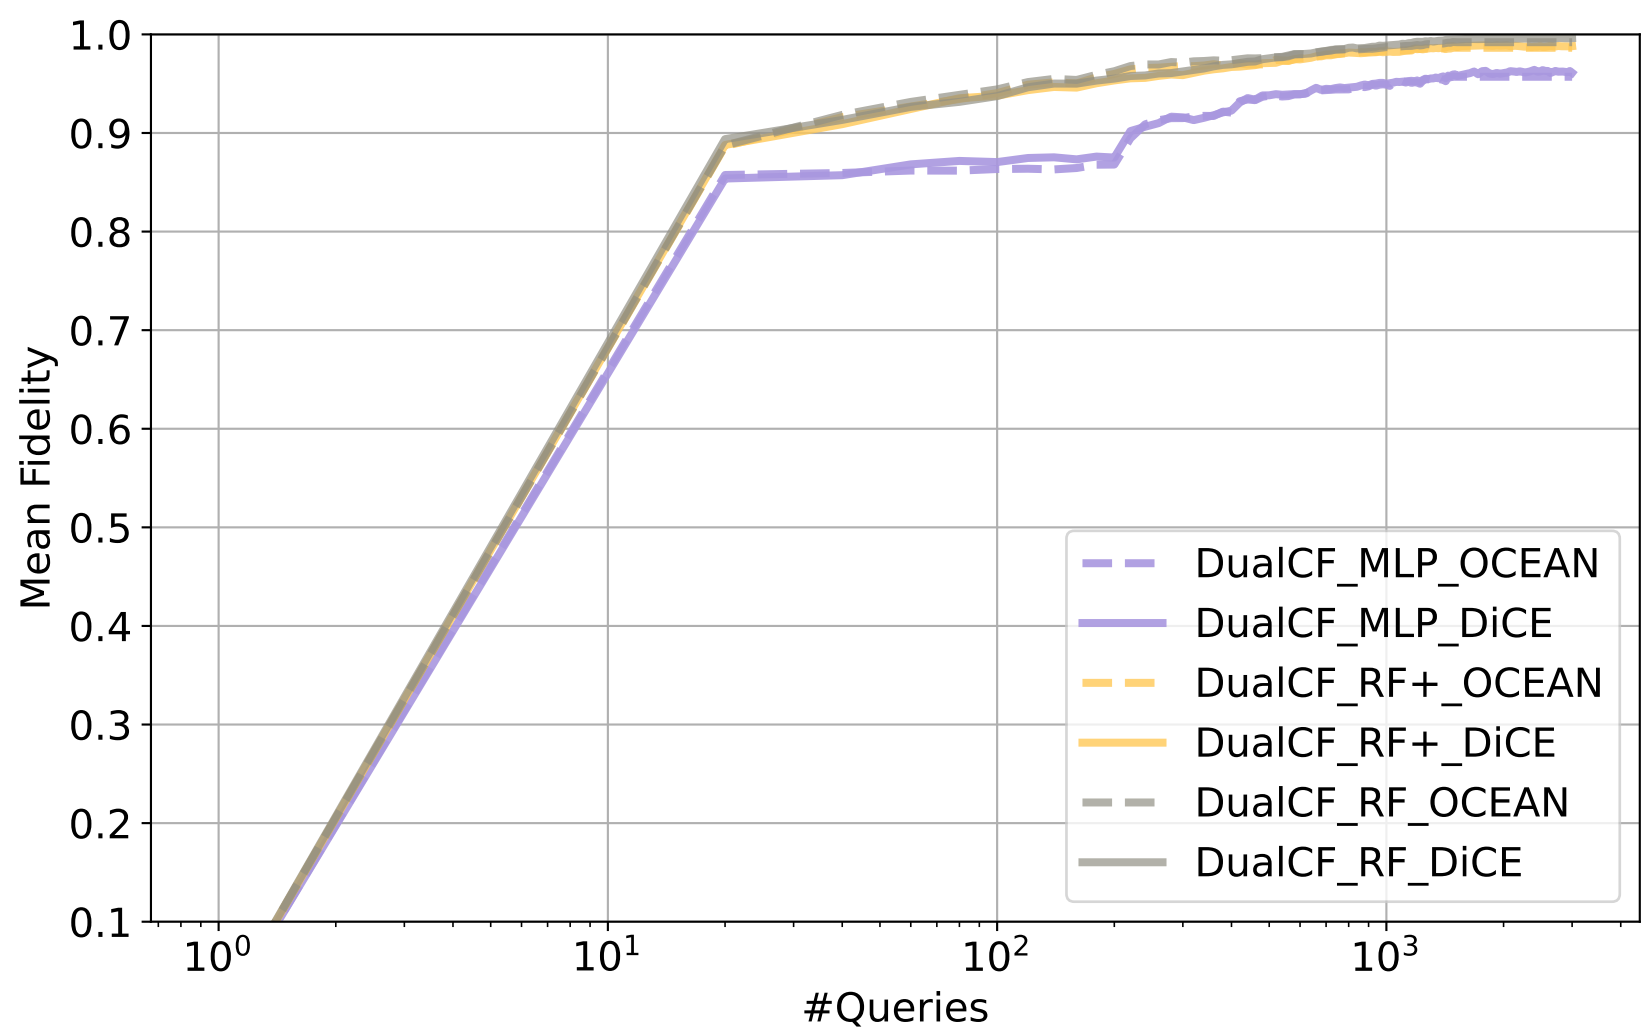

Supplement: supplementary_material [file RF_DualCF.pdf › Tree-Extractor-Submit/experiments/plots/RF_DualCF.pdf]

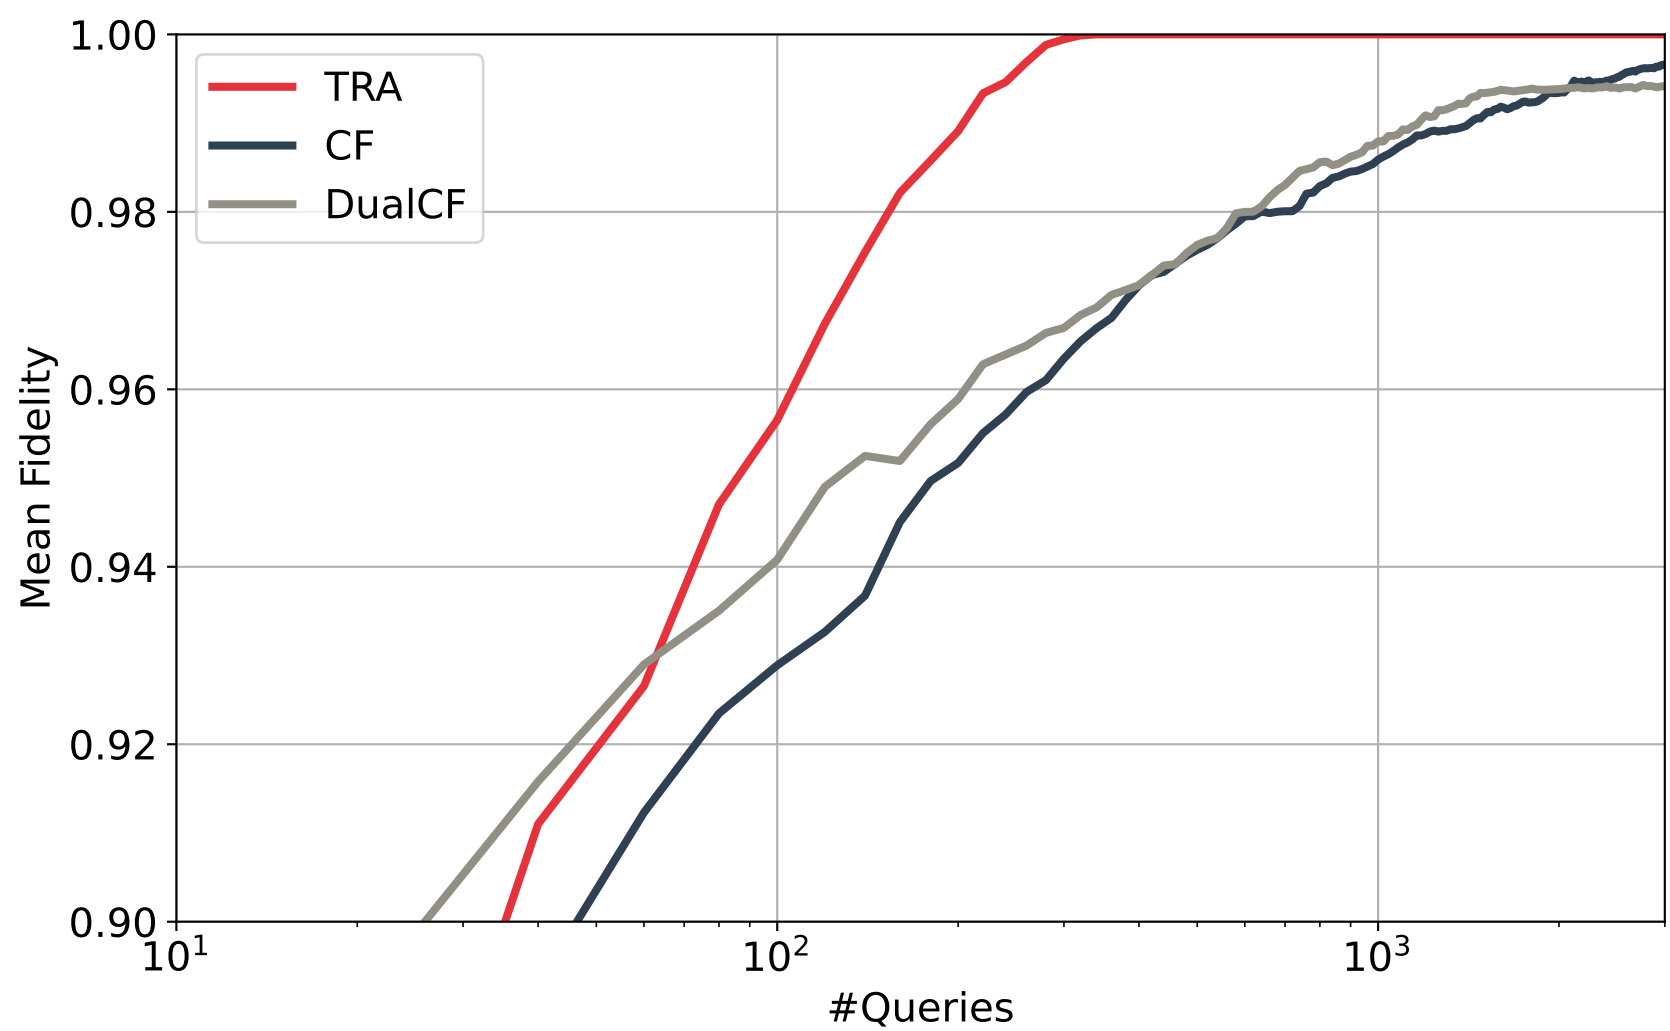

Supplement: supplementary_material [file RF_MFvsQ.pdf › Tree-Extractor-Submit/experiments/plots/RF_MFvsQ.pdf]

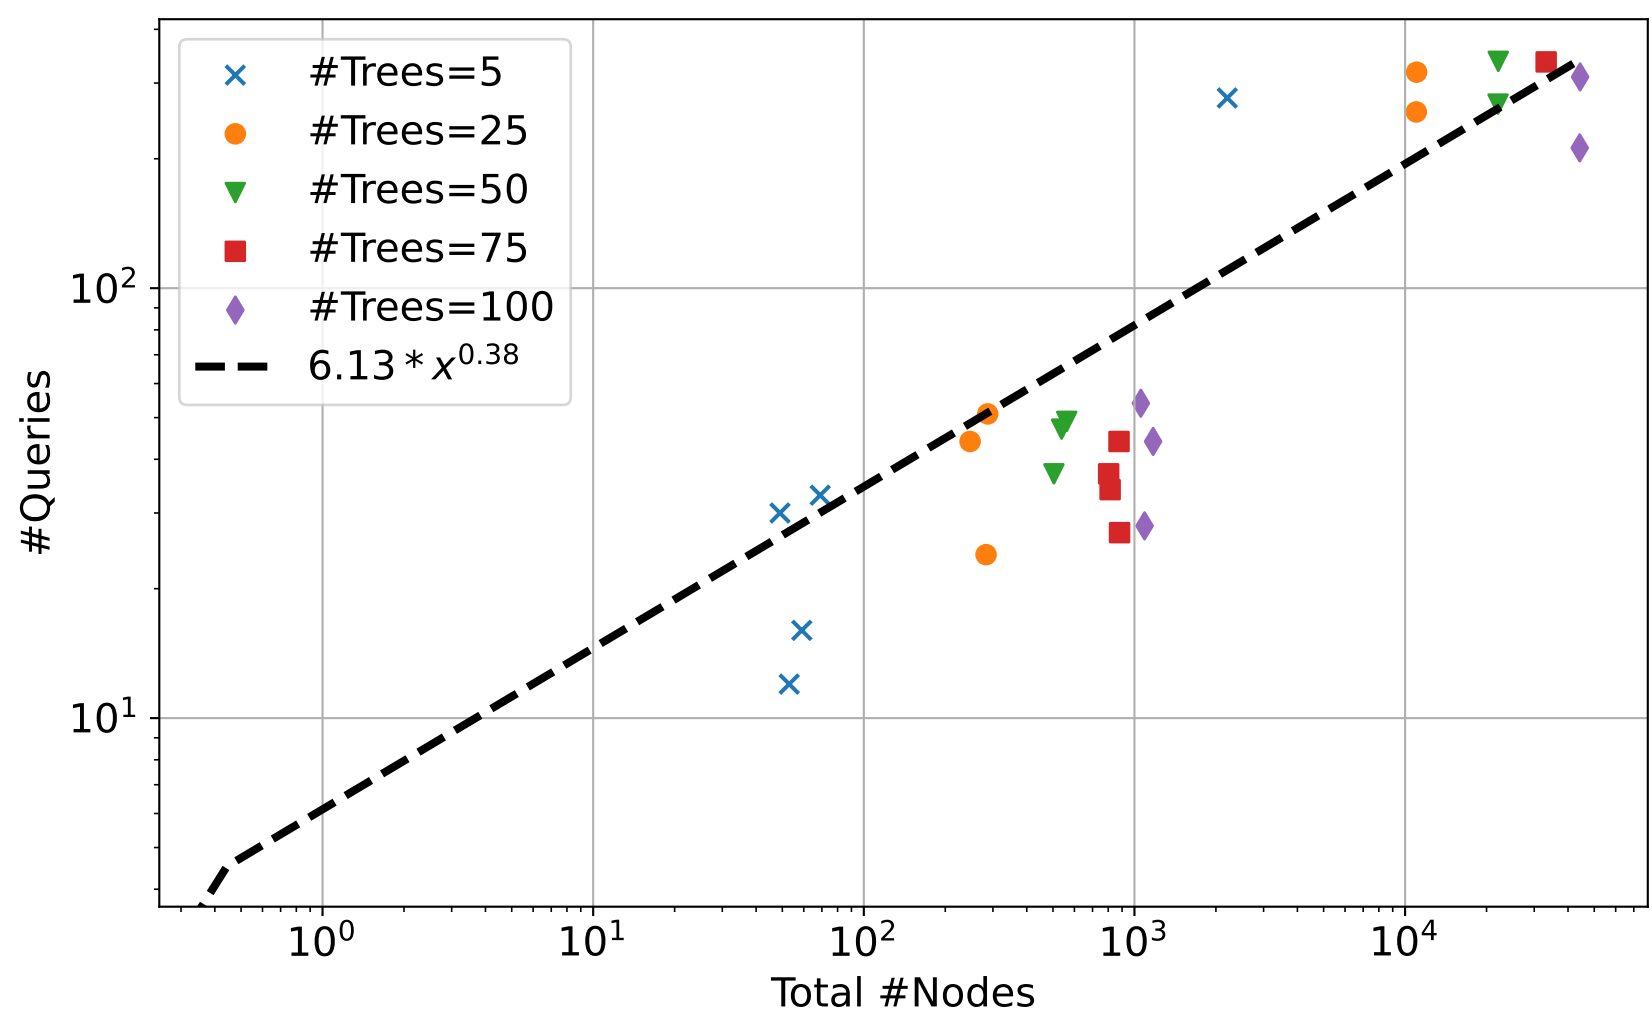

Supplement: supplementary_material [file RF_QvsN_Estimators.pdf › Tree-Extractor-Submit/experiments/plots/RF_QvsN_Estimators.pdf]
